# Supplementary material
Source: Royal Society of Chemistry journal article supplement (doi:10.1039/d6gc01903j)
Supplement: d6gc01903j1.pdf [file d6gc01903j1.pdf]

## Supporting Information

### **Recyclable porphyrin photocatalyst for highly efficient visible-light-driven aerobic oxidation of sulfides**

Congjia Xie,\* Heng Tang, Maolin Yang, Tianzhen Xie, Long Shi, Xiao Peng, Zhongxia Zhao and Wenyun Tan\*

*College of Chemistry and Chemical Engineering, Zhaotong University, Zhaotong, 657000, China.*

\*Correspondence to:

20220053@ztu.edu.cn (Wenyun Tan); 20220054@ztu.edu.cn (Congjia Xie)

## Table of Contents

|                                                                                 |           |
|---------------------------------------------------------------------------------|-----------|
| <b>1. General information</b> .....                                             | <b>3</b>  |
| <b>2. Experimental procedures</b> .....                                         | <b>3</b>  |
| 2.1 General procedures for the synthesis of products.....                       | 3         |
| 2.2 Optimization of reaction conditions .....                                   | 5         |
| 2.3 Gram scale synthesis of <b>2c</b> .....                                     | 6         |
| 2.4 TCPP recycling experiment.....                                              | 8         |
| 2.5 UV-vis absorption measurements.....                                         | 10        |
| <b>3. Mechanistic studies</b> .....                                             | <b>10</b> |
| 3.1 Light on-off experiment.....                                                | 10        |
| 3.2 Scavenging experiments .....                                                | 11        |
| 3.3 EPR spectroscopy experiments.....                                           | 12        |
| <b>4. Comparison with reported porphyrin-based photocatalytic systems</b> ..... | <b>12</b> |
| <b>5. Analytical data of compounds</b> .....                                    | <b>17</b> |
| <b>6. NMR spectra of substrates and products</b> .....                          | <b>26</b> |
| <b>7. References</b> .....                                                      | <b>45</b> |

## 1. General information

UV-Vis absorption spectra were measured using a Shimadzu UV-2700 spectrophotometer across 200–800 nm. Target compounds were performed on a Shimadzu GC-2010 plus equipped with a capillary column (SH-Rtx-5 30 m × 0.25 μm) and a flame ionization detector, or a Shimadzu HPLC-16 equipped with a C18 column. Electron spin resonance (EPR) spectra were acquired on a JES-FA200 EPR spectrometer. Proton nuclear magnetic resonance (<sup>1</sup>H-NMR) spectra were obtained on a Bruker Avance 400 or 500 spectrometer at 400 or 500 MHz. Carbon-13 nuclear magnetic resonance (<sup>13</sup>C-NMR) was obtained on Bruker Avance 400 or 500 spectrometer at 100 or 125 MHz. Chemical shifts are reported in parts per million (δ) referenced to tetramethylsilane (0.0 ppm), chloroform (7.26 ppm or 77.0 ppm) and methanol (3.31 ppm or 49.0 ppm), respectively. Data for <sup>1</sup>H-NMR and <sup>13</sup>C-NMR spectroscopy are reported as follows: chemical shift (δ ppm), multiplicity (s = singlet, d = doublet, t = triplet, q = quartet, m = multiplet, br = broad), coupling constant (Hz), integration. High-resolution mass spectra were recorded on an AB QSTAR Pulsar mass spectrometer. Photocatalytic reactions were carried out in a multi-channel photocatalytic reactor (PCX-50C Discover, Beijing Perfectlight Technology Co., Ltd.) equipped with 10 W white LED lamps (total light intensity ≈ 310 mW·cm<sup>-2</sup>). The known compounds were characterized by <sup>1</sup>H NMR and <sup>13</sup>C NMR, and the NMR data were identical to those reported in the corresponding literatures. Silica gel (200–300 mesh) for column chromatography and silica GF<sub>254</sub> for TLC were produced by Merch Chemicals Co. Ltd. (Shanghai). Petroleum ether with the boiling range of 60-90 °C is used for column chromatography. Starting materials and reagents used in reactions were obtained commercially from Acros, Aldrich, Fluka, Adamas-beta®, and were used without purification, unless otherwise indicated.

## 2. Experimental procedures

### 2.1 General procedures for the synthesis of products

**General procedure A:** A 50 mL quartz vial equipped with a magnetic stir bar was charged with the sulfide (2.0 mmol), tetrakis(4-carboxyphenyl)porphyrin (1.6 mg, 0.0020 mmol), and EtOH/H<sub>2</sub>O (5.0 mL, 95:5, v/v). The solution was purged with

oxygen via a steel needle for 5 min. The vial was then sealed, and an oxygen balloon was attached through the inlet port. The mixture was irradiated with a white LED light setup (PCX-50C, Beijing Perfectlight Technology Co., Ltd.). The reaction was monitored by GC or HPLC until complete conversion of the starting material was achieved. After the reaction, the solvent was removed under reduced pressure and recovered for reuse. The resulting residue was dissolved in ethyl acetate (EtOAc, 10 mL) with sonication for 5 min. The solution was then transferred to a 50 mL centrifuge tube, diluted with petroleum ether (PE, 20 mL), and subjected to ultrasonication for an additional 10 min. The resulting mixture was centrifuged at 9800 rpm and 25 °C for 10 min. This centrifugation process was repeated twice, and the solid catalyst was collected by decantation. The organic layer was then concentrated under reduced pressure and dried under vacuum at 25 °C for 0.5 h to afford the product without further purification, while the solvent was recovered for reuse.

**General procedure B:** A 50 mL quartz vial equipped with a magnetic stir bar was charged with the sulfide (0.2 mmol), tetrakis(4-carboxyphenyl)porphyrin (1.6 mg, 0.0020 mmol), and trifluoroacetic acid (5.0 mL). Otherwise, the procedure followed General procedure A.

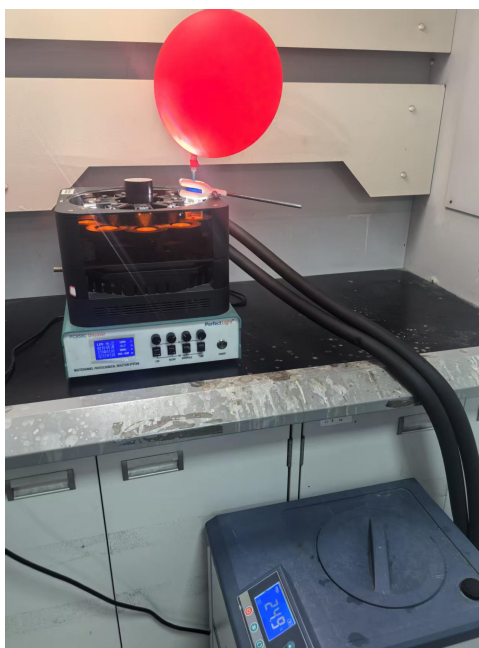

**Fig. S1** Photograph of the photoreactor setup.

Table S1 Optimization of solvent system for oxidation-resistant sulfides.

| Entry          | Substrate                                                                         | Product                                                                           | Solvent               | Additive   | Time    | Yield |
|----------------|-----------------------------------------------------------------------------------|-----------------------------------------------------------------------------------|-----------------------|------------|---------|-------|
| 1 <sup>a</sup> | 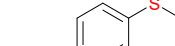 |  | EtOH/H <sub>2</sub> O | —          | 135 min | 97%   |
| 2 <sup>b</sup> |  |  | EtOH/H <sub>2</sub> O | 1.5 eq TFA | 90 min  | 98%   |

Conversion and selectivity for sulfides and sulfoxides determined by GC were calculated as the following equations:

$$\text{Conversion (\%)} = \frac{\text{reacted sulfide (mmol)}}{\text{total sulfide (mmol)}} \times 100\%$$

$$\text{Selectivity for sulfoxide (\%)} = \frac{\text{sulfoxide (mmol)}}{\text{sulfide (mmol)} + \text{sulfoxide (mmol)} + \text{sulfone (mmol)}} \times 100\%$$

$$\text{GC Yield (\%)} = \text{Conversion (\%)} \times \text{Selectivity (\%)} \times 100\%$$

## 2.2 Optimization of reaction conditions

### 2.2.1 General Optimization Procedure

A 50 mL quartz vial equipped with a magnetic stir bar was charged with sulfide 1a (2.0 mmol), tetrakis(4-carboxyphenyl)porphyrin (1.6 mg, 0.0020 mmol), and the solvent (5.0 mL). The solution was purged with oxygen via a steel needle for 5 min. The vial was then sealed, and an oxygen balloon was attached through the inlet port. The mixture was irradiated with a white LED light setup (PCX-50C, Beijing Perfectlight Technology Co., Ltd.) for a predetermined time. After the reaction, an aliquot of the mixture was taken to determine the conversion and selectivity by GC-FID using benzophenone as an internal standard. The remaining solvent was then removed under reduced pressure and recovered for reuse. The residue was purified by flash chromatography using a gradient elution of petroleum ether/ethyl acetate (2:1, then 1:1) to afford pure sulfoxide 2a. The product was further dried under vacuum, and the isolated yield was calculated based on the weight.

### 2.2.2 Solvent Optimization for Oxidation-Resistant Sulfides

|                 |                                                                                   |                                                                                   |                       |            |         |       |
|-----------------|-----------------------------------------------------------------------------------|-----------------------------------------------------------------------------------|-----------------------|------------|---------|-------|
| 3 <sup>c</sup>  |                                                                                   |                                                                                   | TFA                   | —          | 20 min  | 96%   |
| 4 <sup>a</sup>  |                                                                                   |                                                                                   | EtOH/H <sub>2</sub> O | —          | 210 min | 79%   |
| 5 <sup>b</sup>  | 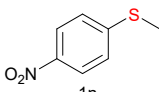 |  | EtOH/H <sub>2</sub> O | 1.5 eq TFA | 210min  | 98%   |
| 6 <sup>c</sup>  |                                                                                   |                                                                                   | TFA                   | —          | 30 min  | 96%   |
| 7 <sup>a</sup>  |                                                                                   |                                                                                   | EtOH/H <sub>2</sub> O | —          | 120 min | 6%    |
| 8 <sup>b</sup>  |  |  | EtOH/H <sub>2</sub> O | 1.5 eq TFA | 120 min | 80%   |
| 9 <sup>c</sup>  |                                                                                   |                                                                                   | TFA                   | —          | 30 min  | 99%   |
| 10 <sup>a</sup> |                                                                                   |                                                                                   | EtOH/H <sub>2</sub> O | —          | 135 min | 42%   |
| 11 <sup>b</sup> |  |  | EtOH/H <sub>2</sub> O | 1.5 eq TFA | 135 min | 94%   |
| 12 <sup>c</sup> |                                                                                   |                                                                                   | TFA                   | —          | 30 min  | 99%   |
| 13 <sup>a</sup> |                                                                                   |                                                                                   | EtOH/H <sub>2</sub> O | —          | 150 min | Trace |
| 14 <sup>b</sup> |  |  | EtOH/H <sub>2</sub> O | 1.5 eq TFA | 150 min | Trace |
| 15 <sup>c</sup> |                                                                                   |                                                                                   | TFA                   | —          | 40 min  | 99%   |

Reaction conditions: <sup>a</sup>sulfide (0.2 mmol), TCPP (0.01% mol, 1.6mg), EtOH/H<sub>2</sub>O (5 mL), O<sub>2</sub> atmosphere, white LED irradiation, room temperature. <sup>b</sup>sulfide (0.2 mmol), TCPP (0.01% mol, 1.6mg), EtOH/H<sub>2</sub>O (5 mL), TFA (1.5 equiv, 22 ul), O<sub>2</sub> atmosphere, white LED irradiation, room temperature. <sup>c</sup>sulfide (0.2 mmol), TCPP (0.01% mol, 1.6 mg), TFA (5 mL), O<sub>2</sub> atmosphere, white LED irradiation, room temperature.

### 2.3 Gram scale synthesis of 2c

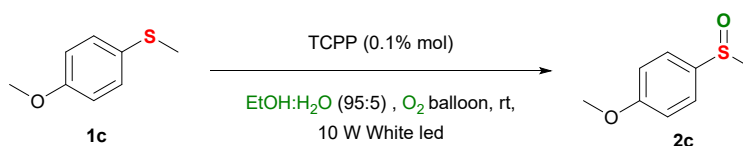

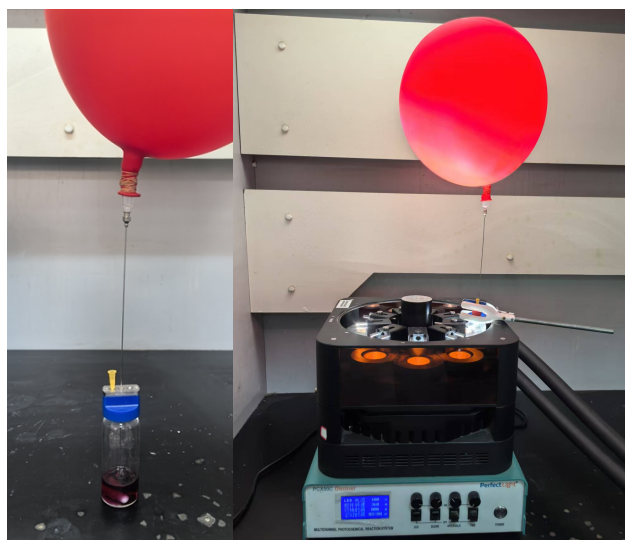

**Fig. S2** Gram scale synthesis of **2c**.

A 50 mL quartz vial equipped with a magnetic stir bar was charged with the sulfide **1c** (7.0 mmol, 1.08 g), tetrakis(4-carboxyphenyl)porphyrin (12.2 mg, 0.0140 mmol), and EtOH/H<sub>2</sub>O (15.0 mL, 95:5, v/v). The solution was purged with oxygen via a steel needle for 5 min. The vial was then sealed, and an oxygen balloon was attached through the inlet port, with a hollow needle inserted through the lid to maintain connection with the atmosphere, ensuring continuous oxygen flow throughout the reaction. The mixture was irradiated with a white LED light setup (PCX-50C, Beijing Perfectlight Technology Co., Ltd.) for 40 min. After the reaction, the solvent was removed under reduced pressure and recovered for reuse. The resulting residue was dissolved in ethyl acetate (EtOAc, 10 mL) with sonication for 5 min. The solution was then transferred to a 50 mL centrifuge tube, diluted with petroleum ether (PE, 20 mL), and subjected to ultrasonication for an additional 10 min. The resulting mixture was centrifuged at 9800 rpm and 25 °C for 10 min. This centrifugation process was repeated twice, and the solid catalyst was collected by decantation. The organic layer was then concentrated under reduced pressure to afford the product without further purification, and the solvent was recovered for reuse.

## **2.4 TCPP recycling experiment**

### **2.4.1 Recycling procedure**

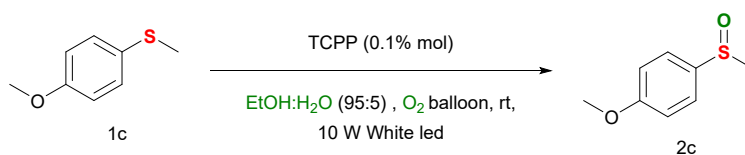

**Scheme S1** Recyclability test of TCPP for the synthesis of sulfoxide **2c**.

A 50 mL quartz vial equipped with a magnetic stir bar was charged with sulfide **1c** (2.0 mmol, 308.4 mg), tetrakis(4-carboxyphenyl)porphyrin (1.6 mg, 0.0020 mmol), and EtOH/H<sub>2</sub>O (5.0 mL, 95:5, v/v). The solution was purged with oxygen via a steel needle for 5 min. The vial was then sealed, and an oxygen balloon was attached through the inlet port. The mixture was irradiated with a white LED light setup (PCX-50C, Beijing Perfectlight Technology Co., Ltd.) for 15 min. After the reaction, the solvent was removed under reduced pressure and recovered for reuse. The resulting residue was dissolved in ethyl acetate (EtOAc, 10 mL) with sonication for 5 min. The solution was then transferred to a 50 mL centrifuge tube, diluted with petroleum ether (PE, 20 mL), and subjected to ultrasonication for an additional 10 min. The resulting mixture was centrifuged at 9800 rpm and 25 °C for 10 min. This centrifugation process was repeated twice, and the solid catalyst was collected by decantation, dried under vacuum at 25 °C for 1 h, and then directly used for the next run. The organic layer was collected, and the yield and selectivity of the product were determined by GC-FID using benzophenone as an internal standard.

#### 2.4.2 NMR and HRMS characterization of the recovered TCPP

TCPP after reaction (recovered after eight cycles) <sup>1</sup>H NMR (600 MHz, DMSO) δ 13.30 (s, 4H), 8.82 (s, 8H), 8.35 (d, *J* = 8.0 Hz, 8H), 8.29 (d, *J* = 8.0 Hz, 8H), -2.97 (s, 2H). <sup>13</sup>C NMR (150 MHz, DMSO) δ 167.5, 145.5, 134.5, 130.5, 128.0, 119.4. HRMS (ESI) *m/z* calcd. for C<sub>48</sub>H<sub>31</sub>N<sub>4</sub>O<sub>8</sub> [M+H]<sup>+</sup>: 791.2136, found: 791.2143.

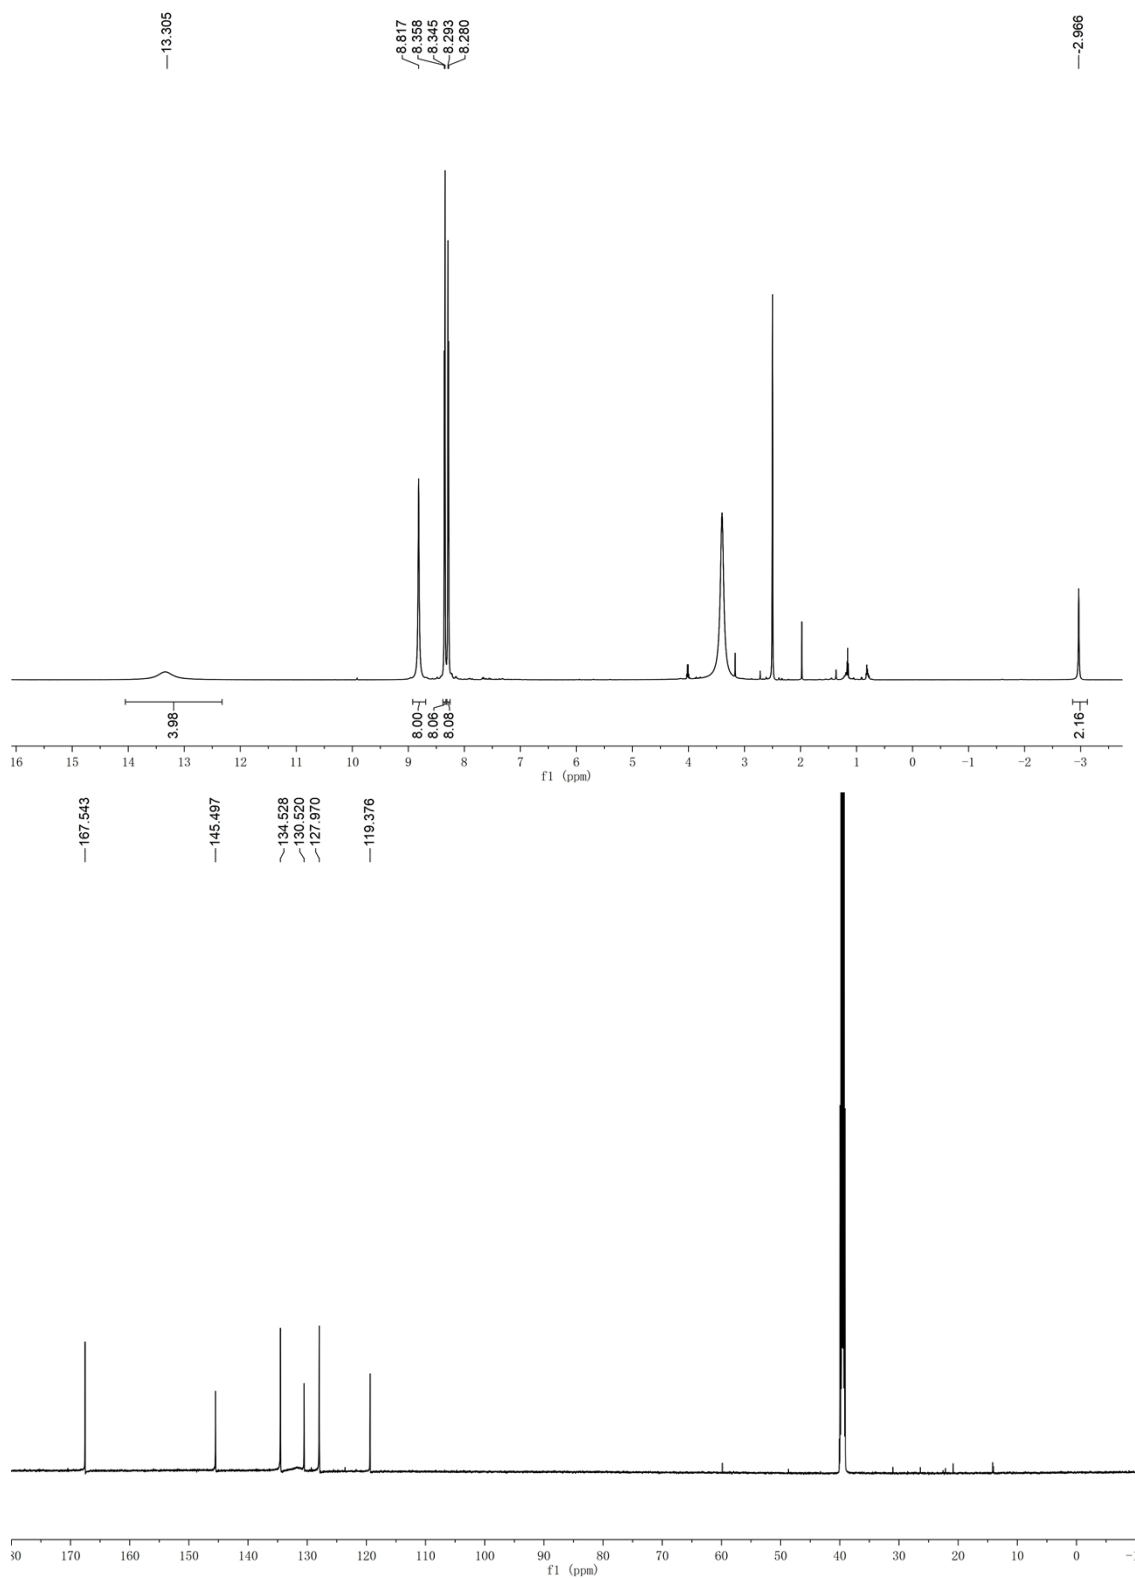

**Fig. S3 <sup>1</sup>H NMR and <sup>13</sup>C NMR spectrum (DMSO-d<sub>6</sub>) of TCPP recovered after eight cycles.**

**Fig. S4 HRMS spectrum of TCPP recovered after eight cycles (showing  $[M+H]^+ = 799.20$ , calcd 799.22).**

## 2.5 UV-vis absorption measurements

Fresh TCPP or the recovered TCPP was dissolved to prepare a solution with a concentration of  $0.096 \mu\text{g mL}^{-1}$ . The resulting solution was then transferred into a cuvette for UV-vis absorption measurement over the wavelength range of 200–800 nm.

## 3. Mechanistic studies

### 3.1 Light on-off experiment

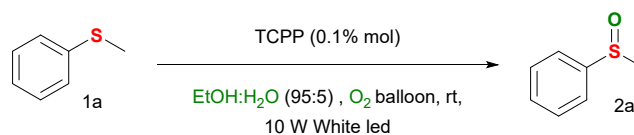

**Scheme S2** Light on-off experiment for synthesis 2a catalyzed by TCPP.

A 50 mL quartz vial equipped with a magnetic stir bar was charged with thioanisole (2.0 mmol, 248.4 mg), tetrakis(4-carboxyphenyl)porphyrin (1.6 mg, 0.0020 mmol), and EtOH/H<sub>2</sub>O (5.0 mL, 95:5, v/v). The solution was purged with oxygen via a steel needle for 5 min. The vial was then sealed, and an oxygen balloon was attached through the inlet port. The mixture was irradiated with a white LED light setup (PCX-50C, Beijing Perfectlight Technology Co., Ltd.) using alternating intervals of light and darkness. To investigate the necessity of continuous irradiation, the yield of product 2a as a function of time. After the reaction, the solvent was removed under reduced pressure and recovered for reuse. After the reaction, the solvent was removed under reduced pressure and recovered for reuse. The residue was purified by flash chromatography using a gradient elution of petroleum ether/ethyl acetate (2:1, then 1:1) to afford pure sulfoxide 2a. The product was further dried under vacuum, and the yield was calculated based on the isolated weight.

### 3.2 Scavenging experiments

A 50 mL quartz vial equipped with a magnetic stir bar was charged with

thioanisole (2.0 mmol, 248.4 mg), tetrakis(4-carboxyphenyl)porphyrin (1.6 mg, 0.0020 mmol), and EtOH/H<sub>2</sub>O (5.0 mL, 95:5, v/v). The solution was purged with oxygen via a steel needle for 5 min. To investigate the role of reactive species, various additives were introduced separately: chloroform (1.0 equiv), 1,4-diazabicyclo[2.2.2]-octane (DABCO, 0.2 equiv), sodium azide (NaN<sub>3</sub>, 0.3 equiv), silver nitrate (AgNO<sub>3</sub>, 0.1 equiv), ethylenediaminetetraacetic acid (EDTA, 0.1 equiv), and isopropanol (0.1 equiv). Following the addition, The mixture was irradiated with a white LED light setup (PCX-50C, Beijing Perfectlight Technology Co., Ltd.). After the reaction, the solvent was removed under reduced pressure and recovered for reuse. The residue was purified by flash chromatography using a gradient elution of petroleum ether/ethyl acetate (2:1, then 1:1) to afford pure sulfoxide 2a. The product was further dried under vacuum, and the yield was calculated based on the isolated weight.

**Table S2** Scavenging experiments for the photocatalytic oxidation of thioanisole by TCPP.

| Entry | Scavenger            | Target Species                | Amount (equiv) | Yield of 2a (%) <sup>a</sup> |
|-------|----------------------|-------------------------------|----------------|------------------------------|
| 1     | CHCl <sub>3</sub>    | O <sub>2</sub> • <sup>-</sup> | 1.0            | 97                           |
| 2     | DABCO                | <sup>1</sup> O <sub>2</sub>   | 0.2            | 68                           |
| 3     | NaN <sub>3</sub>     | <sup>1</sup> O <sub>2</sub>   | 0.3            | trace                        |
| 4     | AgNO <sub>3</sub>    | e <sup>-</sup>                | 0.1            | 90                           |
| 5     | EDTA                 | h <sup>+</sup>                | 0.1            | 94                           |
| 6     | <i>iso</i> -propanol | •OH                           | 0.1            | 93                           |
| 7     | None                 | -                             | -              | 97                           |

<sup>a</sup>Yields are isolated yields. All reactions was performed with 1a (2 mmol) and the catalyst (0.1 mol%) in solvent (5 mL) under an O<sub>2</sub> atmosphere (balloon) and irradiation with a 10 W white LED

### 3.3 EPR spectroscopy experiments

**Detection of reactive oxygen species with TCPP catalyst:** A 50 mL quartz vial equipped with a magnetic stir bar was charged with TCPP (1.6 mg, 0.0020 mmol) and

EtOH/H<sub>2</sub>O (5.0 mL, 95:5, v/v). The solution was purged with oxygen via a steel needle for 5 min in the dark. Subsequently, thioanisole (1a) (2.0 mmol, 248.4 mg) was added. For the detection of <sup>1</sup>O<sub>2</sub>, 2,2,6,6-tetramethylpiperidine (TEMP, 34 mg, 0.2 mmol) was added to the mixed solution. For the detection of superoxide radical anion (O<sub>2</sub><sup>•-</sup>), DMPO (4.5 mg, 0.04 mmol) was used in place of TEMP. After irradiation of the mixed solution with a 60 W incandescent lamp under O<sub>2</sub> for 5 min, the EPR spectrum was recorded ( microwave frequency: 9.450059 GHz; power: 10.0 mW; center field: 336.00 mT; sweep width: 3.93 mT; modulation frequency: 125000 Hz; modulation amplitude: 100 μT.).

#### **4. Comparison with reported porphyrin-based photocatalytic systems**

**Table S3** Comparison of reported porphyrin-based photocatalytic sulfide oxidation systems with this work.

| Entry | Catalysts                                                                                                                                                                                                                    | System type | Substrate (mmol)                                     | Solvent (mL)                                                                  | Time (h/min) | Yield (%) | Substrate scope <sup>a</sup>                                                                                                          | Light source/Oxidant                               | Ref.      |
|-------|------------------------------------------------------------------------------------------------------------------------------------------------------------------------------------------------------------------------------|-------------|------------------------------------------------------|-------------------------------------------------------------------------------|--------------|-----------|---------------------------------------------------------------------------------------------------------------------------------------|----------------------------------------------------|-----------|
| 1     | TCPP<br>(commercial available, 0.1-1.0 mol%, 1.6 mg)                                                                                                                                                                         | Homogeneous | 2 mmol<br>(21 examples);<br>0.2 mmol<br>(8 examples) | EtOH/H <sub>2</sub> O<br>(5 mL, 95/5 v/v)                                     | 15-40 min    | 86-99%    | <b>29 examples:</b><br>(1) dialkyl sulfides;<br>(2) alkyl aryl sulfides<br>(strong/weak EDG, strong/weak EWG);<br>(3) diaryl sulfides | 10W LED white light;<br>O <sub>2</sub>             | This work |
| 2     | TPP<br>(commercial availability, 0.0001 mol%)                                                                                                                                                                                | Homogeneous | 0.68 or 1 mmol                                       | CH <sub>3</sub> COOH or<br>CCl <sub>4</sub> /CH <sub>3</sub> COOH<br>(2.4 mL) | 16 or 32 h   | 58-98%,   | <b>7 examples:</b><br>(1) dialkyl sulfides;<br>(2) alkyl aryl sulfides<br>(weak EDG, weak EWG)                                        | Blue LED<br>(λ <sub>max</sub> =445 nm, 3W);<br>Air | 18        |
| 3     | Porphyrin diacids<br>H <sub>4</sub> TPPY <sub>2</sub><br>(Y=CF <sub>3</sub> COO <sup>-</sup> ,<br>Cl <sub>2</sub> CHCOO <sup>-</sup> ,<br>ClO <sub>4</sub> <sup>-</sup> ,<br>HSO <sub>4</sub> <sup>-</sup> )<br>(0.025 mol%) | Homogeneous | 2.64 mmol                                            | CH <sub>3</sub> CN<br>(10 mL)                                                 | 1-18 h       | 45-96%,   | <b>7 examples:</b><br>(1) dialkyl sulfides;<br>(2) alkyl aryl sulfides<br>(weak EDG, weak EWG)<br>No reaction (diaryl sulfide, 10 h)  | Sunlight irradiation<br>O <sub>2</sub>             | 17        |

|   |                                                                       |               |            |                                                         |           |                                  |                                                                                                                                    |                                           |    |
|---|-----------------------------------------------------------------------|---------------|------------|---------------------------------------------------------|-----------|----------------------------------|------------------------------------------------------------------------------------------------------------------------------------|-------------------------------------------|----|
| 4 | Phosphonate-substituted pyrazinophyrin (0.001 mol%)                   | Homogeneous   | 1 mmol     | CH <sub>2</sub> Cl <sub>2</sub> /MeOH (2.4 mL, 2:1 v/v) | 16 h      | 44%-100%                         | <b>17 examples:</b><br>(1) dialkyl sulfides;<br>(2) alkyl aryl sulfides (strong/weak EDG, weak EWG)                                | Blue LED (430-505 nm, 3W); O <sub>2</sub> | 31 |
| 5 | In(III) pyrazinophyrinate (10 <sup>-3</sup> -5×10 <sup>-4</sup> mol%) | Homogeneous   | 0.5 mmol   | CH <sub>3</sub> COOH (2.4 mL)                           | 8 or 16 h | 53-100% (8 h);<br>97-100% (16 h) | <b>7 examples:</b><br>(1) dialkyl sulfides;<br>(2) alkyl aryl sulfides (weak EDG, weak EWG)                                        | Blue LED (430-505 nm, 3 W), Air           | 32 |
| 6 | PdF <sub>20</sub> TPP (0.05 mol%),                                    | Homogeneous   | 0.256 mmol | CH <sub>3</sub> CN (1.6 mL)                             | 2-6 h     | 87-94%                           | <b>8 examples:</b><br>(1) dialkyl sulfides;<br>(2) alkyl aryl sulfides (strong/weak EDG, weak EWG)                                 | Light (λ>400nm); O <sub>2</sub> bubbling  | 34 |
| 7 | Fe-EMindTPP (2 mg)                                                    | Heterogeneous | 0.3 mmol   | MeOH (1 mL)                                             | 1.5 -16 h | 21.7-100%                        | <b>17 examples:</b><br>(1) dialkyl sulfides;<br>(2) alkyl aryl sulfides (strong/weak EDG, strong/weak EWG);<br>(3) diaryl sulfides | LED (420 nm, 25 W); O <sub>2</sub>        | 55 |

|    |                                                                  |               |          |                                                           |        |        |                                                                                                           |                                                                             |    |
|----|------------------------------------------------------------------|---------------|----------|-----------------------------------------------------------|--------|--------|-----------------------------------------------------------------------------------------------------------|-----------------------------------------------------------------------------|----|
| 8  | Porphyrin–<br>polyoxotungstate<br>(POM) hybrids<br>(0.003 mol %) | Heterogeneous | 0.1 mmol | CH <sub>3</sub> CN/H <sub>2</sub> O (2<br>mL, 95/5, v/v). | 1 h    | 96%    | <b>1 examples:</b><br>alkyl aryl sulfides                                                                 | Visible light<br>( $\lambda > 400$<br>nm), 25 °C,<br>O <sub>2</sub> (1 atm) | 35 |
| 9  | PyPor-COF<br>(1.0 mg)                                            | Heterogeneous | 0.2 mmol | H <sub>2</sub> O<br>(2.0 mL),                             | 24 h   | 73-99% | <b>14 examples:</b><br>alkyl aryl sulfides<br>(strong/weak EDG,<br>strong/weak EWG)                       | Red LEDs<br>( $\lambda_{\text{max}}=660$<br>nm);<br>Air                     | 58 |
| 10 | ETBA-por COF.<br>(10 mg)                                         | Heterogeneous | 0.5 mmol | CH <sub>3</sub> CN (6.0 mL)<br>and MeOH (2.5<br>mL),      | 3 h    | 90-96% | <b>5 examples:</b><br>alkyl aryl sulfides (weak<br>EDG, weak EWG)                                         | Xe lamp<br>(150 W, $\lambda =$<br>400–780<br>nm);<br>O <sub>2</sub>         | 59 |
| 11 | PdPor-sp <sup>2</sup> c-COF<br>(5 mg)                            | Heterogeneous | 0.3 mmol | MeOH<br>(1 mL)                                            | 48 min | 47-98% | <b>13 examples:</b><br>(1) dialkyl sulfides;<br>(2) alkyl aryl sulfides<br>(strong/weak EDG,<br>weak EWG) | Green LED<br>irradiation<br>(520±10nm,<br>3 W×4);<br>Air                    | 60 |
| 12 | Porphyrin–<br>based COF (Sn-<br>CPF-3, 0.3 mol%<br>based on Sn)  | Heterogeneous | 0.1 mmol | MeOH<br>(1 mL)                                            | 12 h   | 70-99% | <b>6 examples:</b><br>alkyl aryl sulfides<br>(strong/weak EDG,<br>weak EWG)                               | Blue LED,<br>3 W ;<br>O <sub>2</sub>                                        | 61 |

|    |                                              |               |          |                |               |        |                                                                                                                                                                          |                                                             |    |
|----|----------------------------------------------|---------------|----------|----------------|---------------|--------|--------------------------------------------------------------------------------------------------------------------------------------------------------------------------|-------------------------------------------------------------|----|
| 13 | 2D PMOF (Ti)<br>(5 mg)                       | Heterogeneous | 0.3 mmol | MeOH<br>(1 mL) | 24-180<br>min | 77-99% | <p><b>16 examples:</b></p> <p>(1) dialkyl sulfides;<br/>(2) alkyl aryl sulfides<br/>(strong/weak EDG,<br/>strong/weak EWG)</p>                                           | Red LEDs<br>(623 nm, 3<br>W × 4);<br>air                    | 56 |
| 14 | PCBA-<br>functionalized<br>MOF<br>(0.1 mol%) | Heterogeneous | 1 mmol   | MeOH<br>(5 mL) | 6 h           | 3-99%  | <p><b>8 examples:</b></p> <p>(1) dialkyl sulfides;<br/>(2) alkyl aryl sulfides<br/>(strong/weak EDG,<br/>strong/weak EWG)<br/>(3) diaryl sulfides</p>                    | Xenon lamp,<br>150 W;<br>Air                                | 57 |
| 15 | TPPS -BV<br>(10 mg)                          | Heterogeneous | 0.1 mmol | MeOH<br>(2 mL) | 1 h           | 80-99% | <p><b>4 examples:</b></p> <p>(1) alkyl aryl sulfides<br/>(strong/weak EDG,<br/>weak EWG);<br/>No reaction (strong EDG<br/>(-NO<sub>2</sub>) alkyl aryl<br/>sulfides)</p> | Two LED<br>lamp<br>(420–750<br>nm), 17 W;<br>O <sub>2</sub> | 40 |

<sup>a</sup> EDG = electron-donating group; EWG = electron-withdrawing group.

## 5. Analytical data of compounds

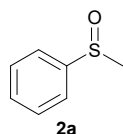

**2a:** Following General procedure A, the desired product **2a** was obtained in 97% yield (272.1 mg).  $^1\text{H NMR}$  (500 MHz,  $\text{CDCl}_3$ )  $\delta$  7.61 – 7.59 (m, 2H), 7.50 – 7.43 (m, 3H), 2.68 (s, 3H).  $^{13}\text{C NMR}$  (125 MHz,  $\text{CDCl}_3$ )  $\delta$  145.6, 131.1, 129.4, 123.5, 43.9. The spectra matched with the previous report.<sup>1</sup>

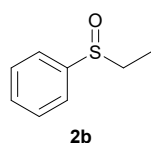

**2b:** Following General procedure A, the desired product **2b** was obtained in 99% yield (306.6 mg).  $^1\text{H NMR}$  (400 MHz,  $\text{CDCl}_3$ )  $\delta$  7.61 – 7.55 (m, 2H), 7.50 – 7.43 (m, 3H), 2.93 – 2.82 (m, 1H), 2.80 – 2.70 (m, 1H), 1.17 (t,  $J = 7.4$  Hz, 3H).  $^{13}\text{C NMR}$  (100 MHz,  $\text{CDCl}_3$ )  $\delta$  143.2, 131.0, 129.2, 124.25, 50.3, 6.1. The spectra matched with the previous report.<sup>1</sup>

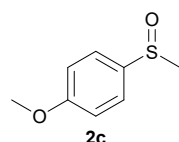

**2c:** Following General procedure A, the desired product **2c** was obtained in 97% yield (33.9 mg).  $^1\text{H NMR}$  (400 MHz,  $\text{CDCl}_3$ )  $\delta$  7.57 – 7.54 (m, 2H), 7.00 – 6.97 (m, 2H), 3.81 (s, 3H), 2.66 (s, 3H).  $^{13}\text{C NMR}$  (100 MHz,  $\text{CDCl}_3$ )  $\delta$  162.0, 136.4, 125.5, 114.9, 55.6, 44.0. The spectra matched with the previous report.<sup>1</sup>

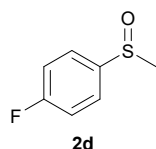

**2d:** Following General procedure A, the desired product **2d** was obtained in 86% yield (272.4 mg).  $^1\text{H NMR}$  (400 MHz,  $\text{CDCl}_3$ )  $\delta$  7.66 – 7.61 (m, 2H), 7.23 – 7.18 (m, 2H), 2.70 (s, 3H).  $^{13}\text{C NMR}$  (100 MHz,  $\text{CDCl}_3$ )  $\delta$  165.6, 163.1, 141.1, 141.1, 126.0, 125.9, 116.9, 116.7, 44.2. The spectra matched with the previous report.<sup>2</sup>

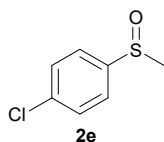

**2e:** Following General procedure A, the desired product **2e** was obtained in 98% yield (337.9 mg).  $^1\text{H NMR}$  (400 MHz,  $\text{CDCl}_3$ )  $\delta$  7.59 – 7.56 (m, 2H), 7.50 – 7.47 (m, 2H), 2.70 (s, 3H).  $^{13}\text{C NMR}$  (100 MHz,  $\text{CDCl}_3$ )  $\delta$  144.1, 137.3, 129.7, 125.1, 44.1. The spectra matched with the previous report.<sup>3</sup>

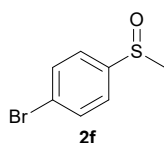

**2f:** Following General procedure A, the desired product **2f** was obtained in 91% yield (272.1 mg).  $^1\text{H NMR}$  (400 MHz,  $\text{CDCl}_3$ )  $\delta$  7.66 – 7.63 (m, 2H), 7.51 – 7.48 (m, 2H), 2.69 (s, 3H).  $^{13}\text{C NMR}$  (100 MHz,  $\text{CDCl}_3$ )  $\delta$  144.9, 132.6, 125.5, 125.2, 44.0. The spectra matched with the previous report.<sup>1</sup>

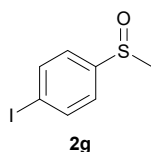

**2g:** Following General procedure A, the desired product **2g** was obtained in 92% yield (491.6 mg).  $^1\text{H NMR}$  (400 MHz,  $\text{CDCl}_3$ )  $\delta$  7.88 – 7.84 (m, 2H), 7.38 – 7.35 (m, 2H), 2.70 (s, 3H).  $^{13}\text{C NMR}$  (100 MHz,  $\text{CDCl}_3$ )  $\delta$  145.7, 138.5, 125.2, 97.5, 44.1. The spectra matched with the previous report.<sup>1</sup>

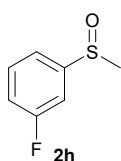

**2h:** Following General procedure A, the desired product **2h** was obtained in 93% yield (293.0 mg).  $^1\text{H NMR}$  (500 MHz,  $\text{CDCl}_3$ )  $\delta$  7.48 – 7.44 (m, 1H), 7.38 – 7.33 (m, 2H), 7.16 – 7.12 (m, 1H), 2.69 (s, 3H).  $^{13}\text{C NMR}$  (125 MHz,  $\text{CDCl}_3$ )  $\delta$  164.1, 162.1, 148.4, 148.4, 131.1, 131.1, 119.2, 119.2, 118.2, 118.1, 110.9, 110.7, 44.0. The spectra matched with the previous report.<sup>3</sup>

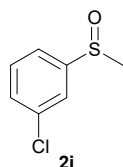

**2i:** Following General procedure A, the desired product **2i** was obtained in 99% yield (344.7 mg). <sup>1</sup>H NMR (500 MHz, CDCl<sub>3</sub>) δ 7.63 – 7.62 (m, 1H), 7.47 – 7.42 (m, 3H), 2.70 (s, 3H). <sup>13</sup>C NMR (125 MHz, CDCl<sub>3</sub>) δ 147.9, 135.7, 131.2, 130.6, 123.7, 121.7, 44.0. The spectra matched with the previous report.<sup>2</sup>

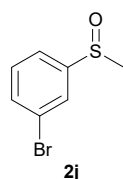

**2j:** Following General procedure A, the desired product **2j** was obtained in 90% yield (396.2 mg). <sup>1</sup>H NMR (400 MHz, CDCl<sub>3</sub>) δ 7.77 (t, *J* = 1.6 Hz, 1H), 7.59 – 7.57 (m, 1H), 7.51 – 7.49 (m, 1H), 7.36 (t, *J* = 7.8 Hz, 1H), 2.70 (s, 3H). <sup>13</sup>C NMR (100 MHz, CDCl<sub>3</sub>) δ 147.8, 134.1, 130.9, 126.5, 123.6, 122.1, 44.0. The spectra matched with the previous report.<sup>3</sup>

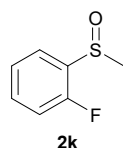

**2k:** Following General procedure A, the desired product **2k** was obtained in 95% yield (301.9 mg). <sup>1</sup>H NMR (500 MHz, CDCl<sub>3</sub>) δ 7.81 – 7.79 (m, 1H), 7.46 – 7.42 (m, 1H), 7.34 (t, *J* = 7.5 Hz, 1H), 7.06 (t, *J* = 9.0 Hz, 1H), 2.77 (s, 3H). <sup>13</sup>C NMR (125 MHz, CDCl<sub>3</sub>) δ 158.4, 156.5, 132.8, 132.7, 132.7, 132.7, 125.4, 125.4, 125.3, 125.3, 115.8, 115.6, 42.1, 42.1. The spectra matched with the previous report.<sup>4</sup>

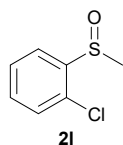

**2l:** Following General procedure A, the desired product **2l** was obtained in 99% yield (346.5 mg). <sup>1</sup>H NMR (500 MHz, CDCl<sub>3</sub>) δ 7.91 (dd, *J* = 7.8, 1.3 Hz, 1H), 7.51 – 7.47 (m, 1H), 7.42 – 7.38 (m, 1H), 7.35 – 7.34 (m, 1H), 2.77 (s, 3H). <sup>13</sup>C NMR (125 MHz,

CDCl<sub>3</sub>)  $\delta$  143.6, 132.0, 129.8, 128.2, 125.3, 41.7. The spectra matched with the previous report.<sup>4</sup>

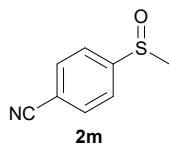

**2m:** Following General procedure B, the desired product **2m** was obtained in 96% yield (31.6 mg). <sup>1</sup>H NMR (400 MHz, CDCl<sub>3</sub>)  $\delta$  7.83 (d, *J* = 8.4 Hz, 2H), 7.76 (d, *J* = 8.4 Hz, 2H), 2.76 (s, 3H). <sup>13</sup>C NMR (100 MHz, CDCl<sub>3</sub>)  $\delta$  151.5, 133.1, 124.4, 117.8, 114.9, 43.9. The spectra matched with the previous report.<sup>1</sup>

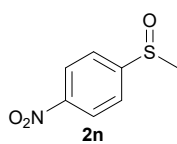

**2n:** Following General procedure B, the desired product **2n** was obtained in 96% yield (35.4 mg). <sup>1</sup>H NMR (400 MHz, CDCl<sub>3</sub>)  $\delta$  8.39 (d, *J* = 8.8 Hz, 2H), 7.84 (d, *J* = 8.8 Hz, 2H), 2.79 (s, 3H). <sup>13</sup>C NMR (100 MHz, CDCl<sub>3</sub>)  $\delta$  153.3, 149.6, 124.8, 124.6, 44.0. The spectra matched with the previous report.<sup>1</sup>

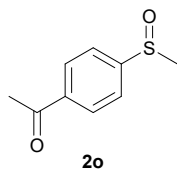

**2o:** A 50 mL quartz vial equipped with a magnetic stir bar was charged with the sulfide **1z** (0.2 mmol), tetrakis(4-carboxyphenyl)porphyrin (1.6 mg, 0.0020 mmol), and EtOH/H<sub>2</sub>O (5.0 mL, 95:5, v/v). Otherwise, the procedure followed General procedure A, the desired product **2z** was obtained in 92% yield (33.6 mg). <sup>1</sup>H NMR (400 MHz, CDCl<sub>3</sub>)  $\delta$  8.10 (d, *J* = 8.4 Hz, 2H), 7.73 (d, *J* = 8.4 Hz, 2H), 2.75 (s, 3H), 2.64 (s, 3H). <sup>13</sup>C NMR (100 MHz, CDCl<sub>3</sub>)  $\delta$  197.2, 151.0, 139.2, 129.3, 123.9, 43.9, 26.9. The spectra matched with the previous report.<sup>1</sup>

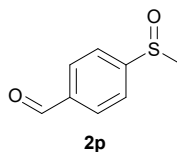

**2p:** A 50 mL quartz vial equipped with a magnetic stir bar was charged with the sulfide **1z** (0.2 mmol), tetrakis(4-carboxyphenyl)porphyrin (1.6 mg, 0.0020 mmol), and EtOH/H<sub>2</sub>O (5.0 mL, 95:5, v/v). Otherwise, the procedure followed General procedure A, the desired product **2z** was obtained in 96% yield (32.2 mg). <sup>1</sup>H NMR (400 MHz, CDCl<sub>3</sub>) δ 10.07 (s, 1H), 8.03 (d, *J* = 8.3 Hz, 2H), 7.81 (d, *J* = 8.3 Hz, 2H), 2.77 (s, 3H). <sup>13</sup>C NMR (100 MHz, CDCl<sub>3</sub>) δ 191.3, 152.5, 138.2, 130.5, 124.3, 43.9. The spectra matched with the previous report.<sup>1</sup>

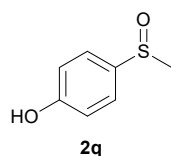

**2q:** Following General procedure A, the desired product **2q** was obtained in 88% yield (274.9 mg). <sup>1</sup>H NMR (400 MHz, CDCl<sub>3</sub>) δ 7.49 (d, *J* = 8.6 Hz, 2H), 6.96 (d, *J* = 8.6 Hz, 2H), 2.76 (s, 3H). <sup>13</sup>C NMR (100 MHz, CDCl<sub>3</sub>) δ 160.8, 132.9, 126.3, 117.0, 43.1. The spectra matched with the previous report.<sup>5</sup>

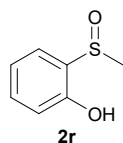

**2r:** Following General procedure A, the desired product **2r** was obtained in 90% yield (274.9 mg). <sup>1</sup>H NMR (500 MHz, CDCl<sub>3</sub>) δ 10.10 (s, 1H), 7.39 – 7.35 (m, 1H), 7.30 – 7.28 (m, 1H), 6.99 – 6.96 (m, 2H), 2.95 (s, 3H). <sup>13</sup>C NMR (125 MHz, CDCl<sub>3</sub>) δ 157.3, 132.9, 125.3, 124.7, 120.2, 118.4, 41.4. The spectra matched with the previous report.<sup>6</sup>

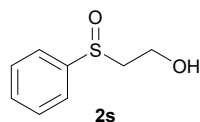

**2s:** Following General procedure A, the desired product **2s** was obtained in 93% yield (315.6 mg). <sup>1</sup>H NMR (400 MHz, CDCl<sub>3</sub>) δ 7.63 – 7.61 (m, 2H), 7.54 – 7.46 (m, 3H), 4.17 – 4.10 (m, 1H), 3.96 – 3.90 (m, 1H), 3.86 (s, 2H), 3.12 – 3.05 (m, 1H), 2.95 – 2.89 (m, 1H). <sup>13</sup>C NMR (100 MHz, CDCl<sub>3</sub>) δ 142.9, 131.3, 129.5, 124.0, 59.4, 56.3. The

spectra matched with the previous report.<sup>7</sup>

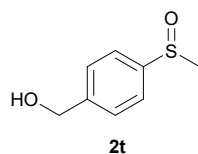

**2t:** Following General procedure A, the desired product **2t** was obtained in 95% yield (322.4 mg). <sup>1</sup>H NMR (400 MHz, CDCl<sub>3</sub>) δ 7.51 (d, *J* = 8.4 Hz, 2H), 7.45 (d, *J* = 8.4 Hz, 2H), 4.69 (s, 2H), 2.67 (s, 3H). <sup>13</sup>C NMR (100 MHz, CDCl<sub>3</sub>) δ 145.2, 143.6, 127.7, 123.7, 64.1, 43.7. The spectra matched with the previous report.<sup>8</sup>

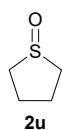

**2u:** Following General procedure A, the desired product **2u** was obtained in 97% yield (206.1 mg). <sup>1</sup>H NMR (500 MHz, CDCl<sub>3</sub>) δ 2.83 – 2.73 (m, 4H), 2.40 – 2.31 (m, 2H), 2.98 – 1.90 (m, 2H). <sup>13</sup>C NMR (125 MHz, CDCl<sub>3</sub>) δ 54.3, 25.4. The spectra matched with the previous report.<sup>9</sup>

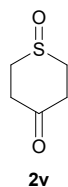

**2v:** Following General procedure A, the desired product **2v** was obtained in 98% yield (259.6 mg). <sup>1</sup>H NMR (500 MHz, CDCl<sub>3</sub>) δ 3.30 – 3.24 (m, 2H), 2.90 – 2.83 (m, 1H), 2.52 – 2.48 (m, 1H). <sup>13</sup>C NMR (125 MHz, CDCl<sub>3</sub>) δ 204.9, 47.2, 32.3. The spectra matched with the previous report.<sup>10</sup>

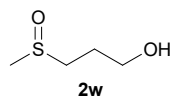

**2w:** Following General procedure A, the desired product **2w** was obtained in 90% yield (219.6 mg). <sup>1</sup>H NMR (500 MHz, CDCl<sub>3</sub>) δ 3.67 – 3.60 (m, 2H), 2.80 – 2.77 (m, 2H), 2.53 (s, 3H), 1.98 – 1.91 (m, 2H). <sup>13</sup>C NMR (125 MHz, CDCl<sub>3</sub>) δ 60.5, 51.3, 38.0, 25.9.

The spectra matched with the previous report.<sup>11</sup>

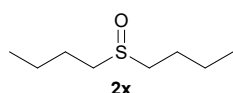

**2x:** Following General procedure A, the desired product **2x** was obtained in 98% yield (318.3 mg). <sup>1</sup>H NMR (500 MHz, CDCl<sub>3</sub>) δ 2.67 – 2.54 (m, 4H), 1.73 – 1.63 (m, 4H), 1.51 – 1.34 (m, 4H), 0.90 (t, *J* = 7.4 Hz, 6H). <sup>13</sup>C NMR (125 MHz, CDCl<sub>3</sub>) δ 52.1, 24.6, 22.1, 13.7. The spectra matched with the previous report.<sup>1</sup>

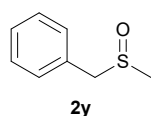

**2y:** Following General procedure A, the desired product **2y** was obtained in 97% yield (300.1 mg). <sup>1</sup>H NMR (400 MHz, CDCl<sub>3</sub>) δ 7.34 – 7.28 (m, 3H), 7.23 – 7.21 (m, 2H), 3.99 (d, *J* = 12.8 Hz, 1H), 3.86 (d, *J* = 12.8 Hz, 1H), 2.39 (s, 3H). <sup>13</sup>C NMR (100 MHz, CDCl<sub>3</sub>) δ 130.1, 129.7, 129.1, 128.6, 60.3, 37.3. The spectra matched with the previous report.<sup>3</sup>

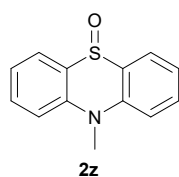

**2z:** A 50 mL quartz vial equipped with a magnetic stir bar was charged with the sulfide **1z** (0.2 mmol), tetrakis(4-carboxyphenyl)porphyrin (1.6 mg, 0.0020 mmol), and EtOH/H<sub>2</sub>O (5.0 mL, 95:5, v/v). Otherwise, the procedure followed General procedure A, the desired product **2z** was obtained in 99% yield (42.9 mg). <sup>1</sup>H NMR (500 MHz, CDCl<sub>3</sub>) δ 7.94 (d, *J* = 7.2 Hz, 2H), 7.62 (t, *J* = 6.5 Hz, 2H), 7.39 (d, *J* = 8.0 Hz, 2H), 7.26 (t, *J* = 7.0 Hz, 2H), 3.75 (s, 3H). <sup>13</sup>C NMR (125 MHz, CDCl<sub>3</sub>) δ 139.9, 132.9, 131.1, 124.6, 121.9, 115.6, 35.4. The spectra matched with the previous report.<sup>1</sup>

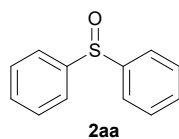

**2aa:** Following General procedure B, the desired product **2aa** was obtained in 96% yield (40.1 mg). <sup>1</sup>H NMR (400 MHz, CDCl<sub>3</sub>) δ 7.65 – 7.60 (m, 4H), 7.48 – 7.43 (m, 6H). <sup>13</sup>C NMR (100 MHz, CDCl<sub>3</sub>) δ 145.7, 131.2, 129.5, 124.9. The spectra matched with the previous report.<sup>1</sup>

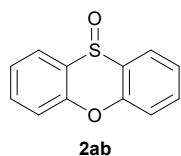

**2ab:** Following General procedure B, the desired product **2ab** was obtained in 99% yield (42.9 mg). <sup>1</sup>H NMR (400 MHz, CDCl<sub>3</sub>) δ 7.93 (dd, *J* = 7.8, 1.4 Hz, 2H), 7.68 – 7.59 (m, 2H), 7.44 (d, *J* = 8.4 Hz, 2H), 7.38 (t, *J* = 7.6 Hz, 2H). <sup>13</sup>C NMR (100 MHz, CDCl<sub>3</sub>) δ 149.6, 133.9, 131.2, 125.0, 123.8, 119.0. The spectra matched with the previous report.<sup>1</sup>

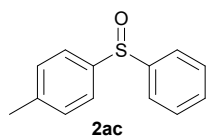

**2ac:** Following General procedure B, the desired product **2ac** was obtained in 99% yield (42.9 mg). <sup>1</sup>H NMR (400 MHz, CDCl<sub>3</sub>) δ 7.64 – 7.61 (m, 2H), 7.53 (d, *J* = 8.0 Hz, 2H), 7.47 – 7.40 (m, 3H), 7.26 (d, *J* = 8.0 Hz, 2H), 2.36 (s, 3H). <sup>13</sup>C NMR (100 MHz, CDCl<sub>3</sub>) δ 145.8, 142.5, 141.8, 131.0, 130.1, 129.4, 125.1, 124.8, 21.5. The spectra matched with the previous report.<sup>1</sup>

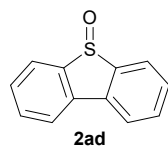

**2ad:** Following General procedure B, the desired product **2ad** was obtained in 99% yield (39.6 mg). <sup>1</sup>H NMR (500 MHz, CDCl<sub>3</sub>) δ 7.96 (d, *J* = 7.5 Hz, 2H), 7.76 (d, *J* = 7.5 Hz, 2H), 7.58 – 7.55 (m, 2H), 7.48 – 7.45 (m, 2H). <sup>13</sup>C NMR (125 MHz, CDCl<sub>3</sub>) δ 144.7, 137.2, 132.7, 129.6, 127.6, 122.0. The spectra matched with the previous report.<sup>1</sup>

## 6. NMR spectra of substrates and products

### $^1\text{H}$ NMR (500 MHz, $\text{CDCl}_3$ ) of 2a

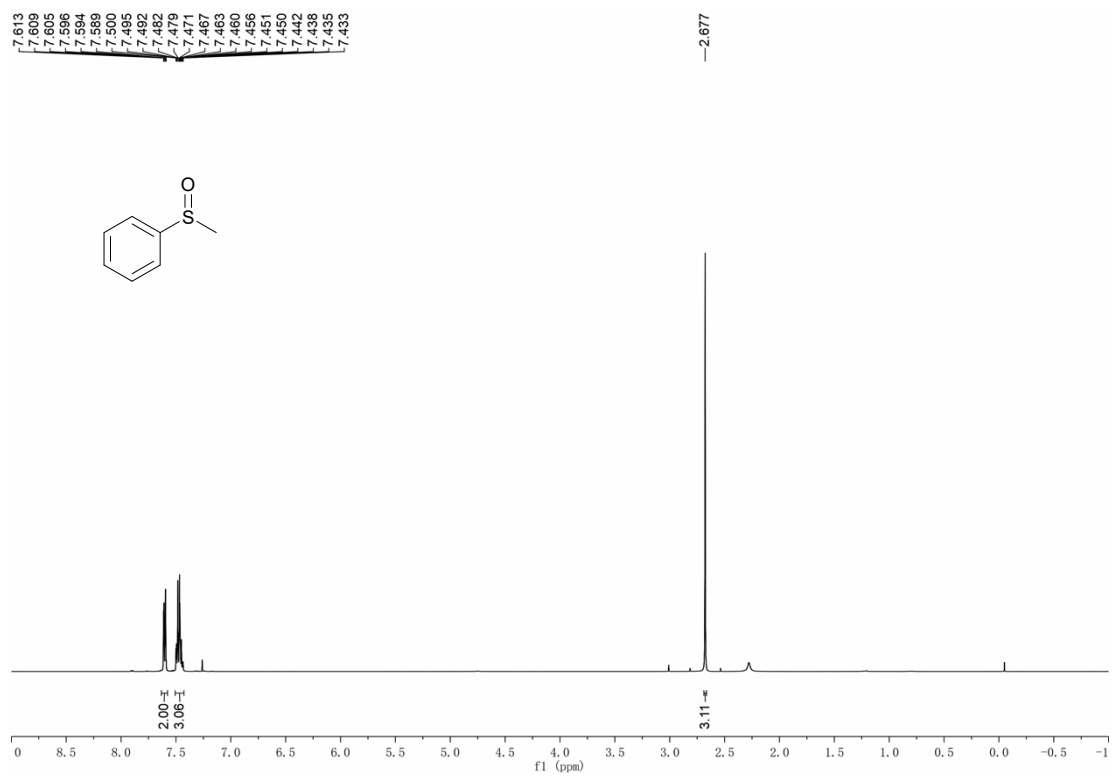

### $^{13}\text{C}$ NMR (500 MHz, $\text{CDCl}_3$ ) of 2a

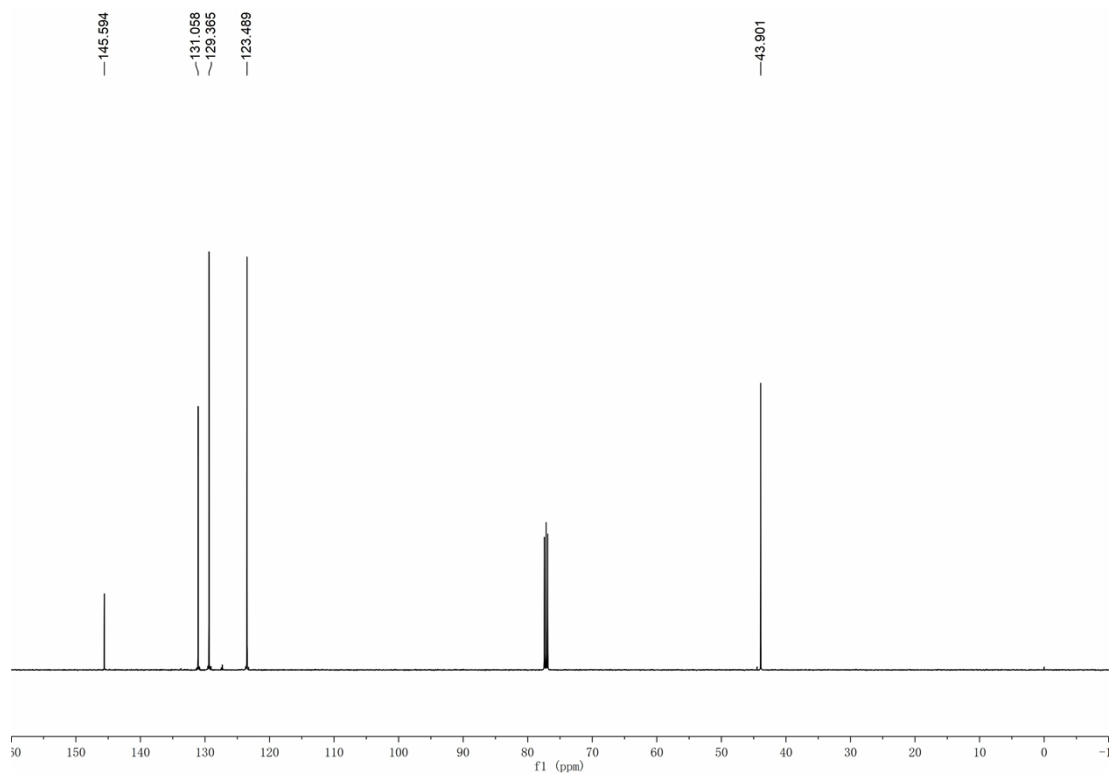

**<sup>1</sup>H NMR (400 MHz, CDCl<sub>3</sub>) of 2d**

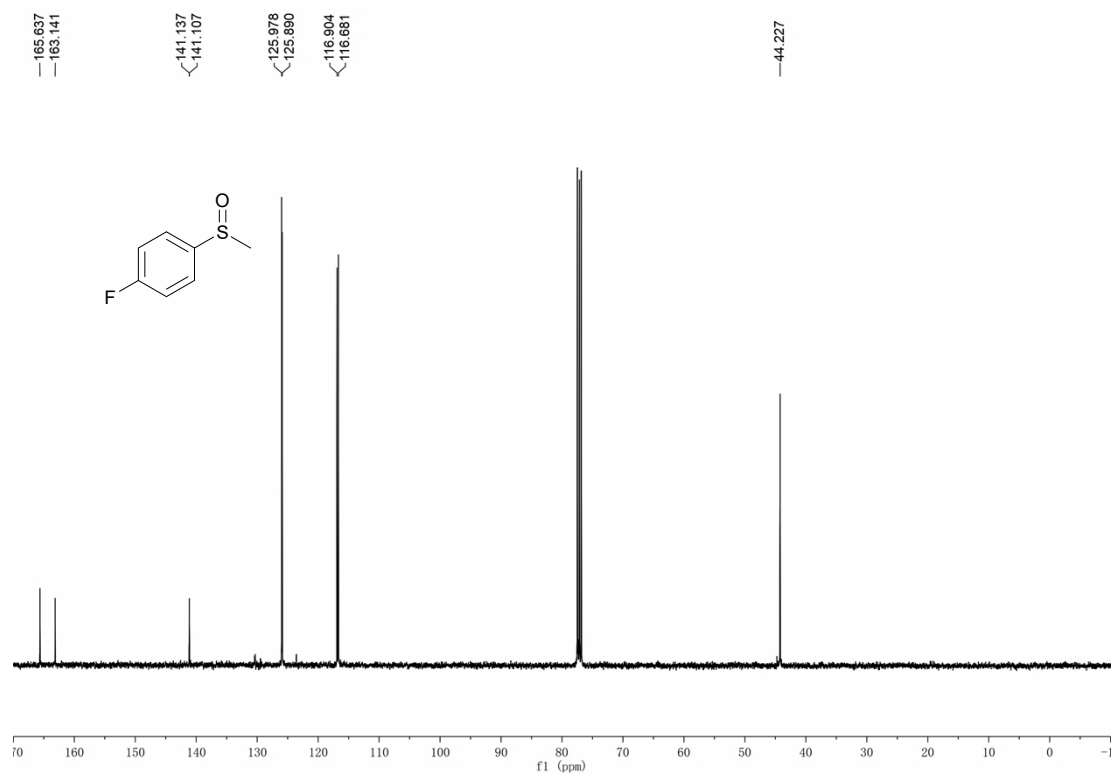

**<sup>13</sup>C NMR (400 MHz, CDCl<sub>3</sub>) of 2d**

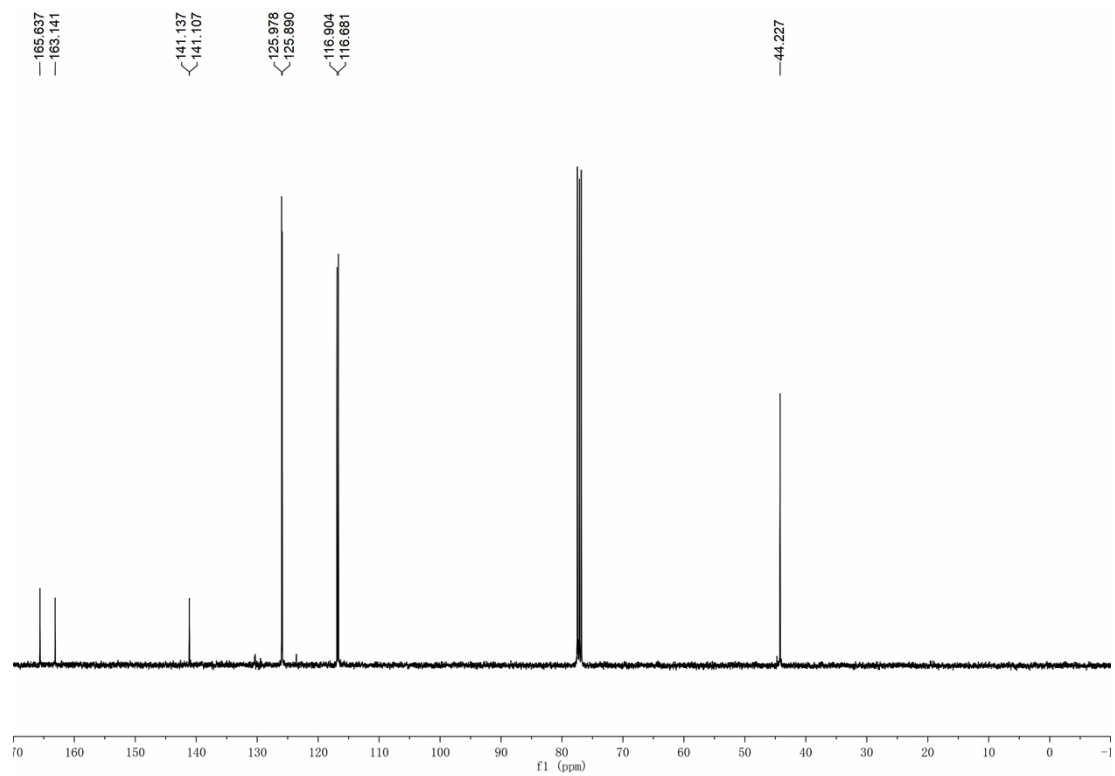

**$^1\text{H}$  NMR (400 MHz,  $\text{CDCl}_3$ ) of 2e**

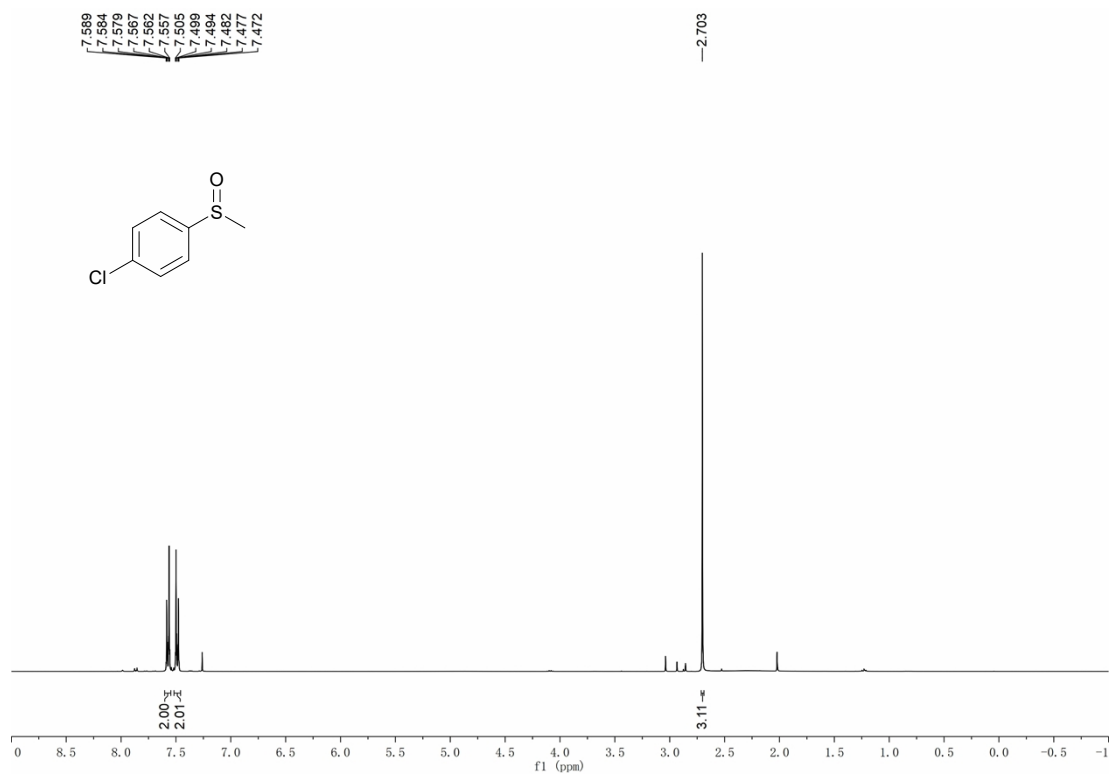

**$^{13}\text{C}$  NMR (400 MHz,  $\text{CDCl}_3$ ) of 2e**

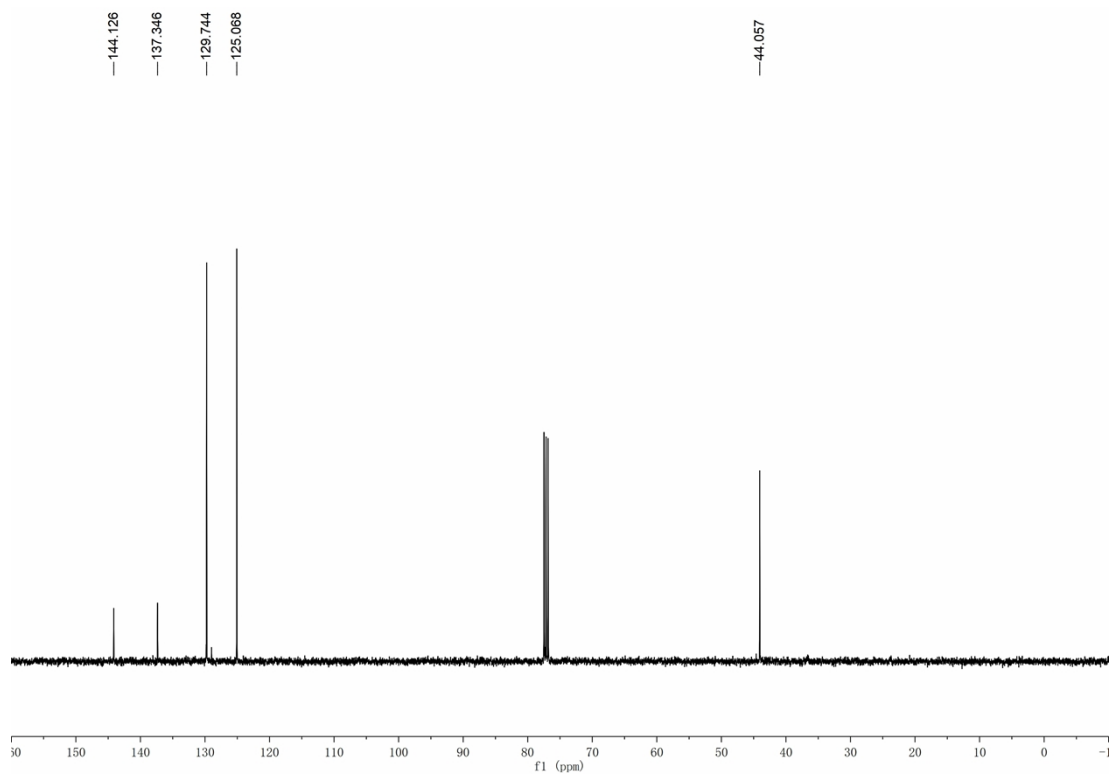

**<sup>1</sup>H NMR (400 MHz, CDCl<sub>3</sub>) of 2f**

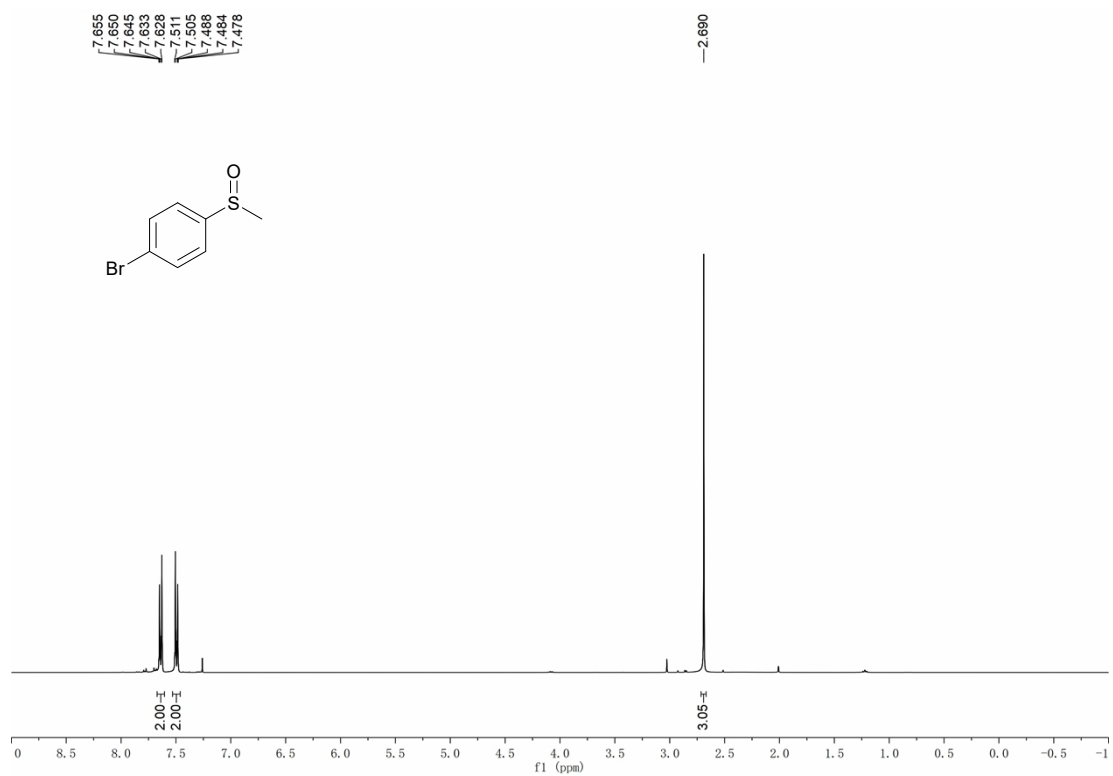

**<sup>13</sup>C NMR (400 MHz, CDCl<sub>3</sub>) of 2f**

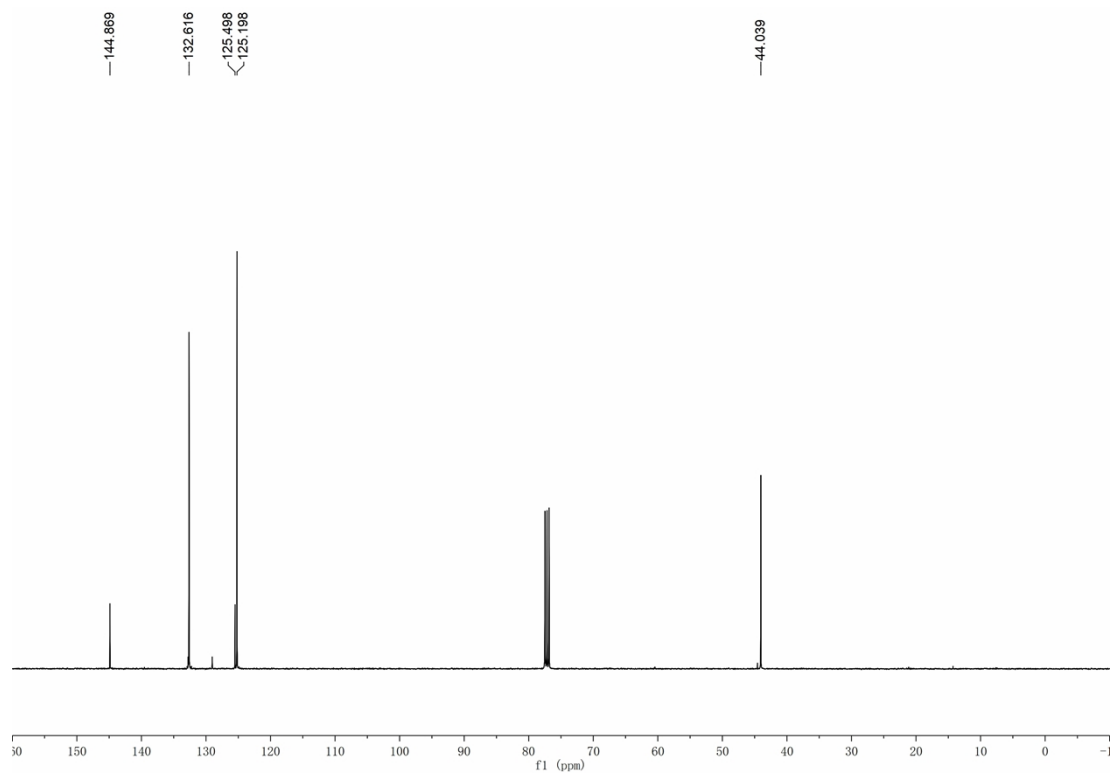

**<sup>1</sup>H NMR (400 MHz, CDCl<sub>3</sub>) of 2j**

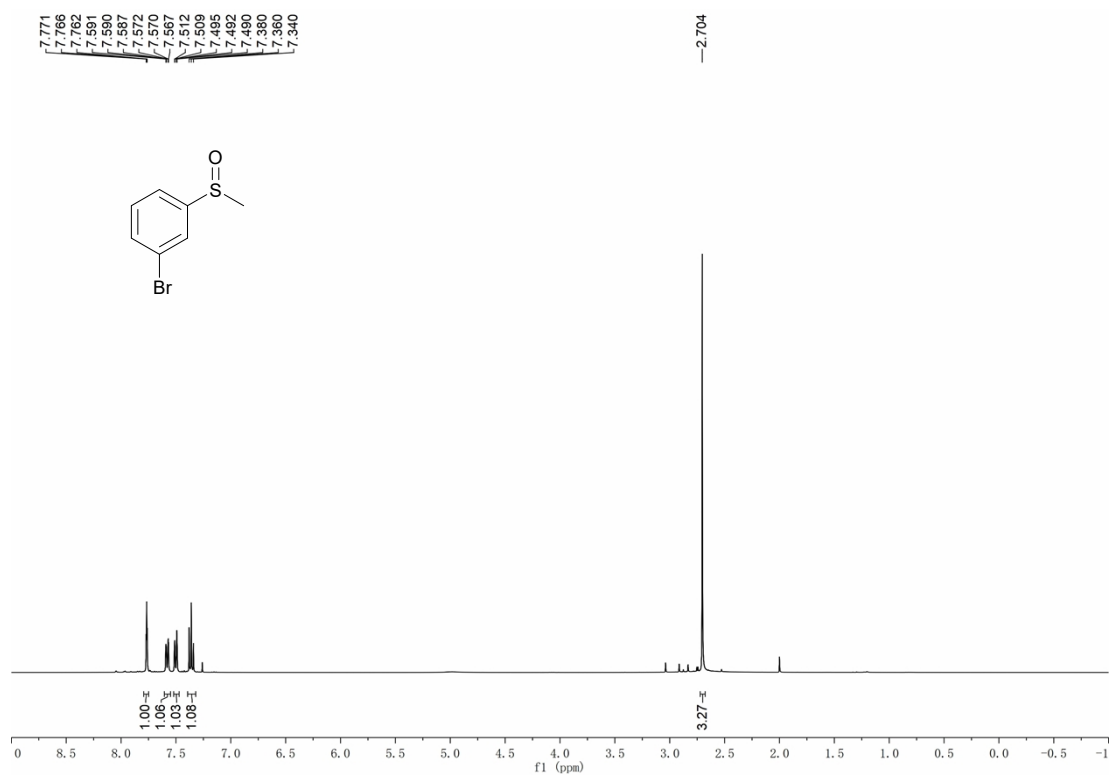

**<sup>13</sup>C NMR (400 MHz, CDCl<sub>3</sub>) of 2j**

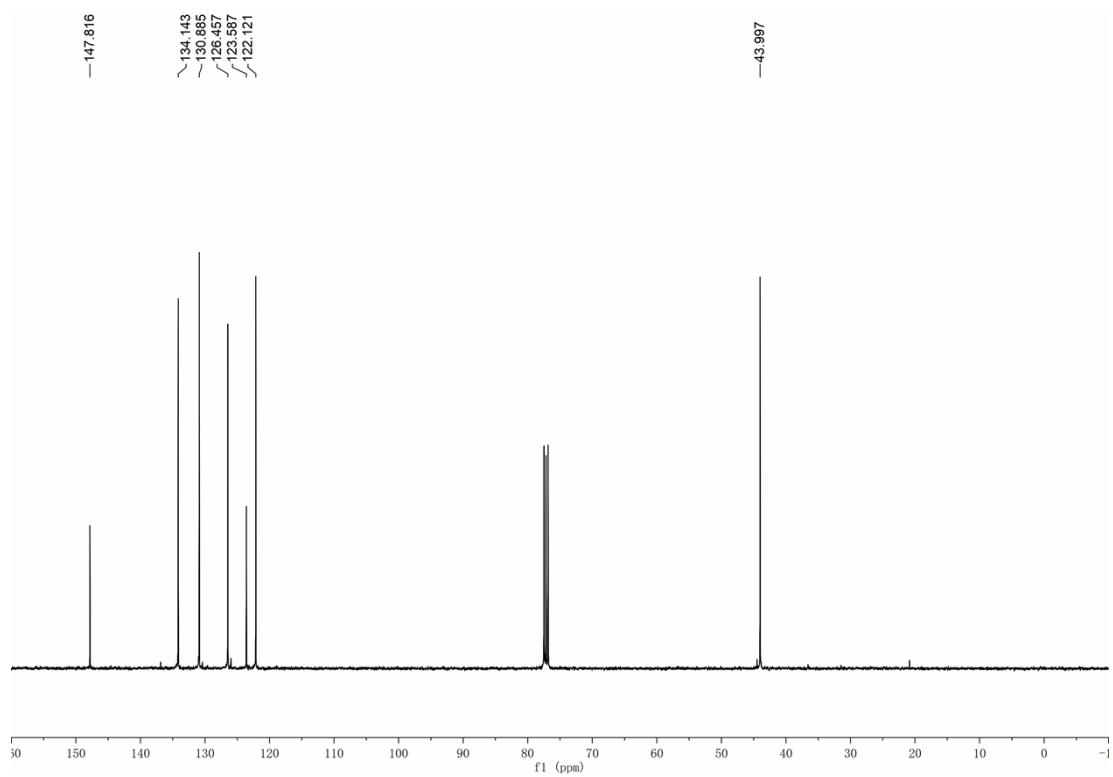

### <sup>1</sup>H NMR (500 MHz, CDCl<sub>3</sub>) of 2k

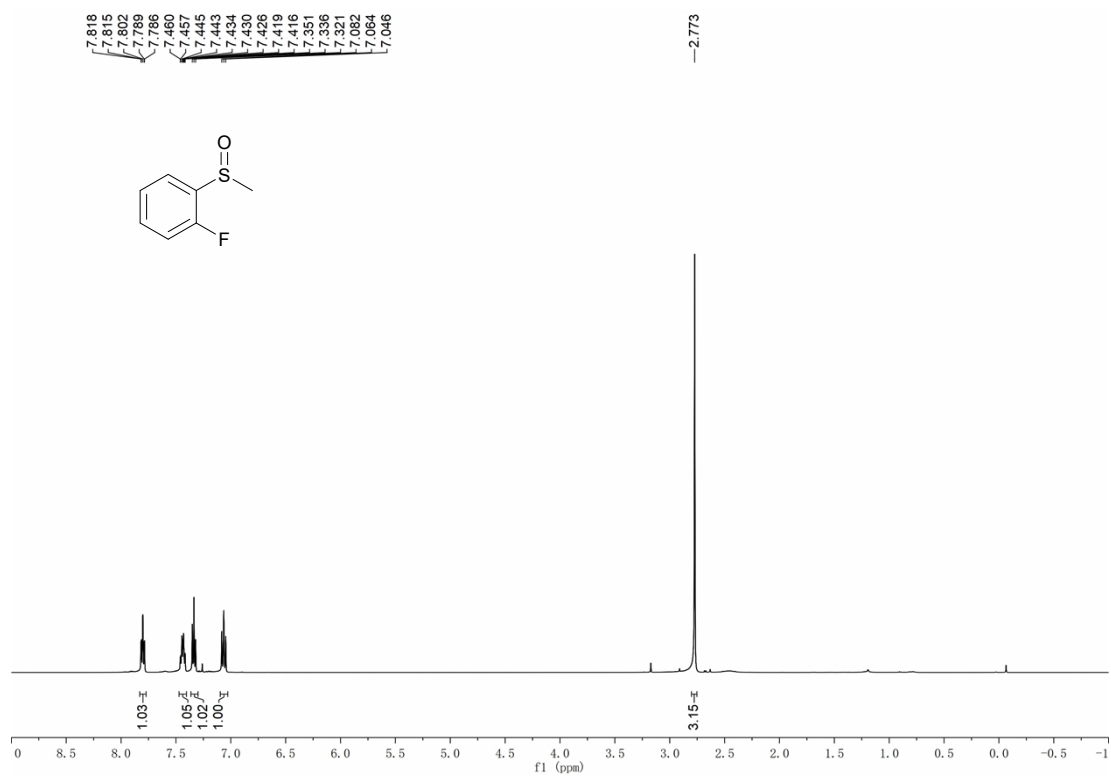

### <sup>13</sup>C NMR (500 MHz, CDCl<sub>3</sub>) of 2k

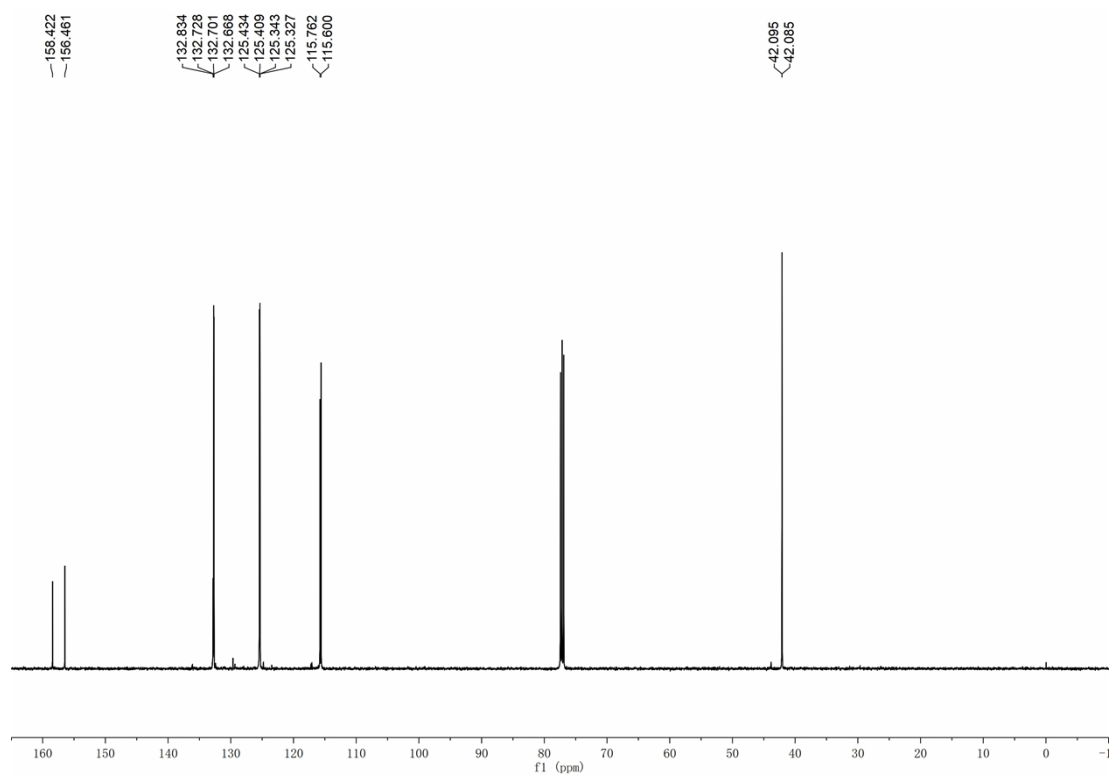

**<sup>1</sup>H NMR (400 MHz, CDCl<sub>3</sub>) of 2m**

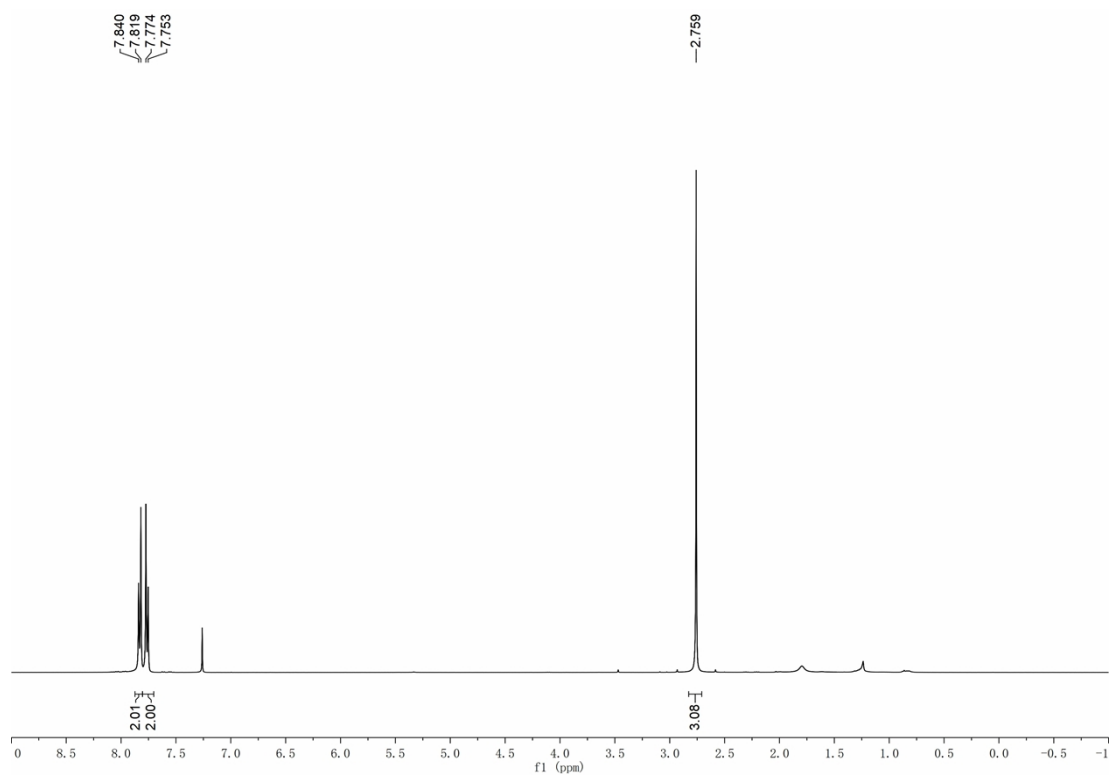

**<sup>13</sup>C NMR (400 MHz, CDCl<sub>3</sub>) of 2m**

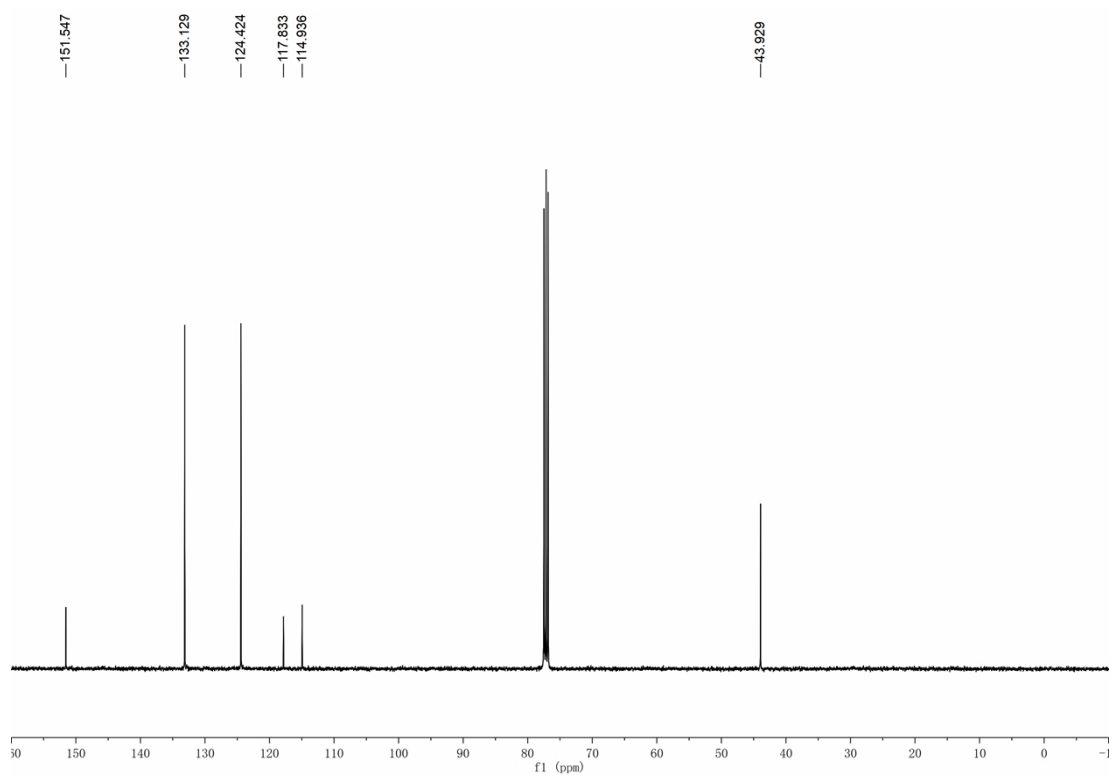

**<sup>1</sup>H NMR (400 MHz, CDCl<sub>3</sub>) of 2n**

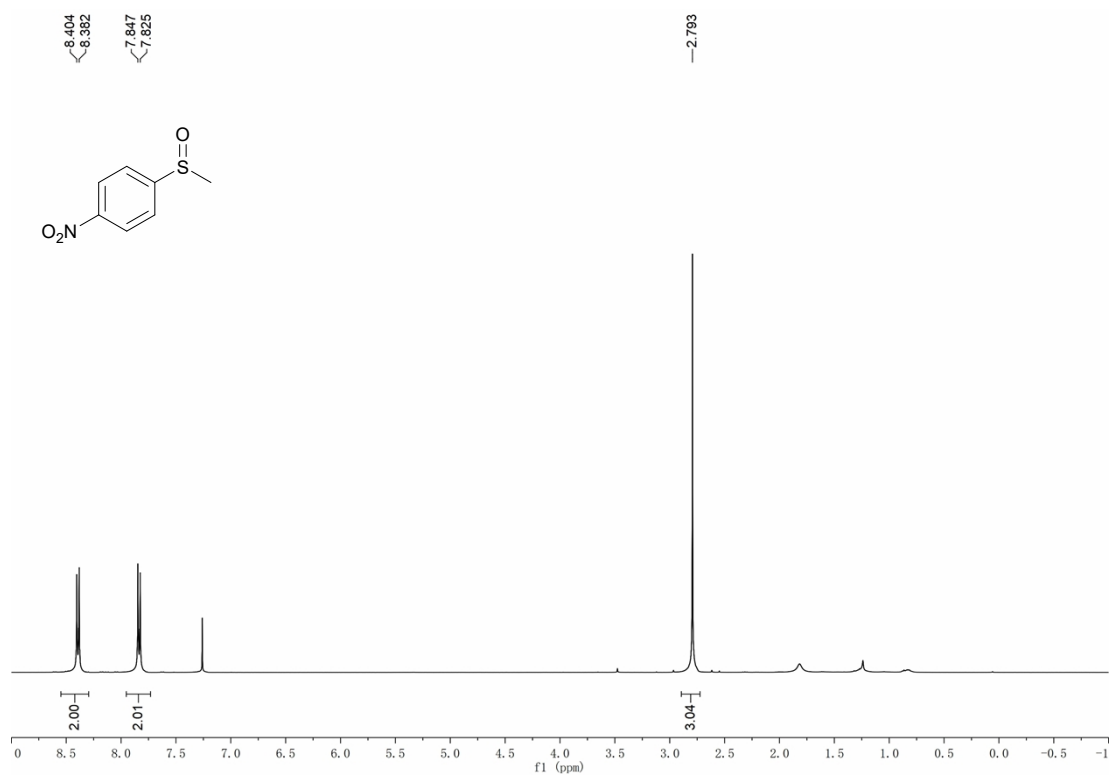

**<sup>13</sup>C NMR (400 MHz, CDCl<sub>3</sub>) of 2n**

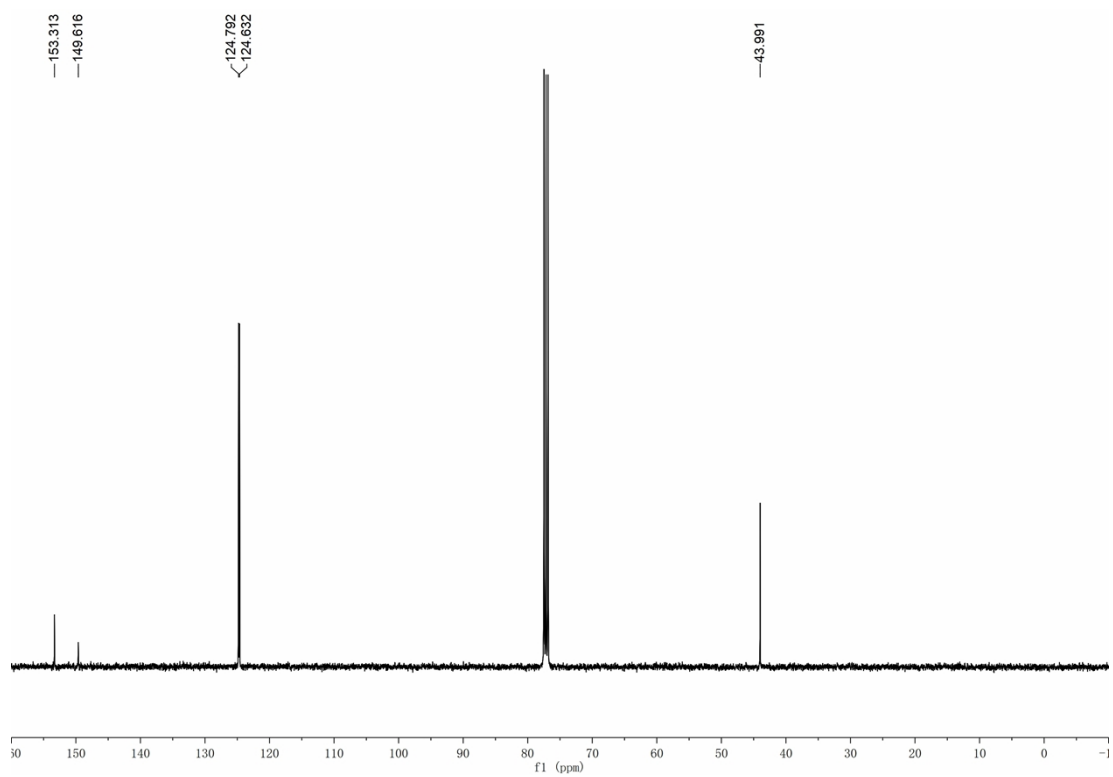

### <sup>1</sup>H NMR (400 MHz, CDCl<sub>3</sub>) of 2o

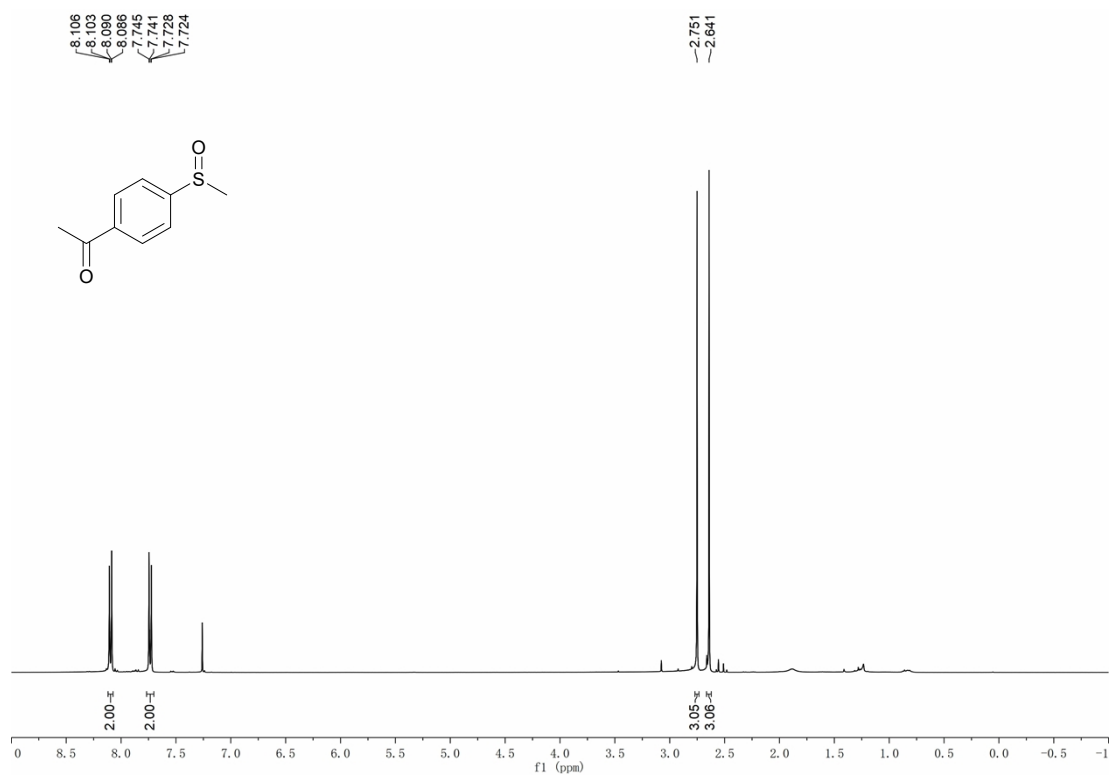

### <sup>13</sup>C NMR (400 MHz, CDCl<sub>3</sub>) of 2o

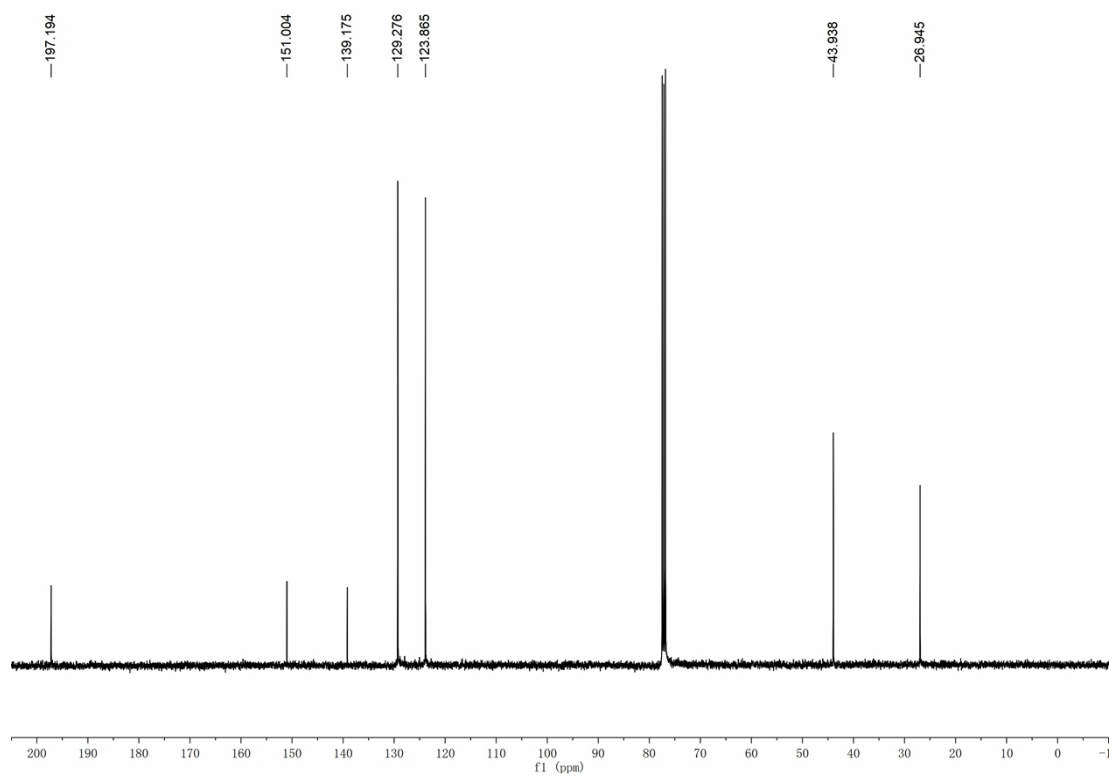

### <sup>1</sup>H NMR (400 MHz, CDCl<sub>3</sub>) of 2p

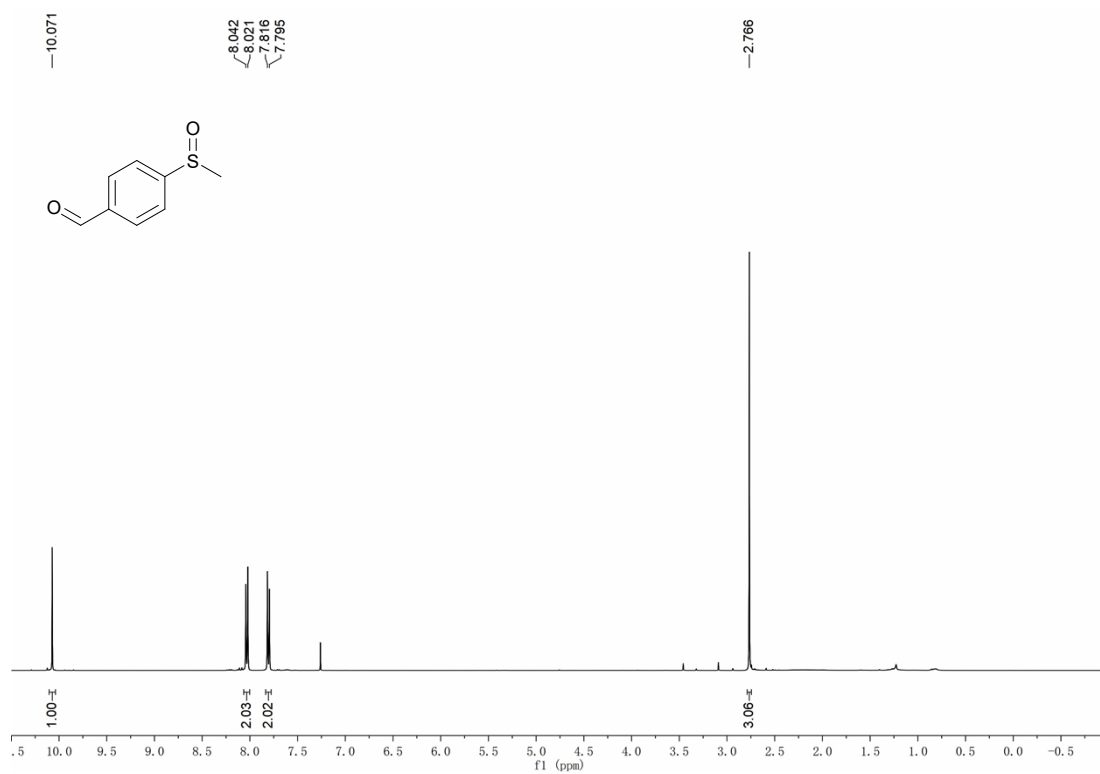

### <sup>13</sup>C NMR (400 MHz, CDCl<sub>3</sub>) of 2p

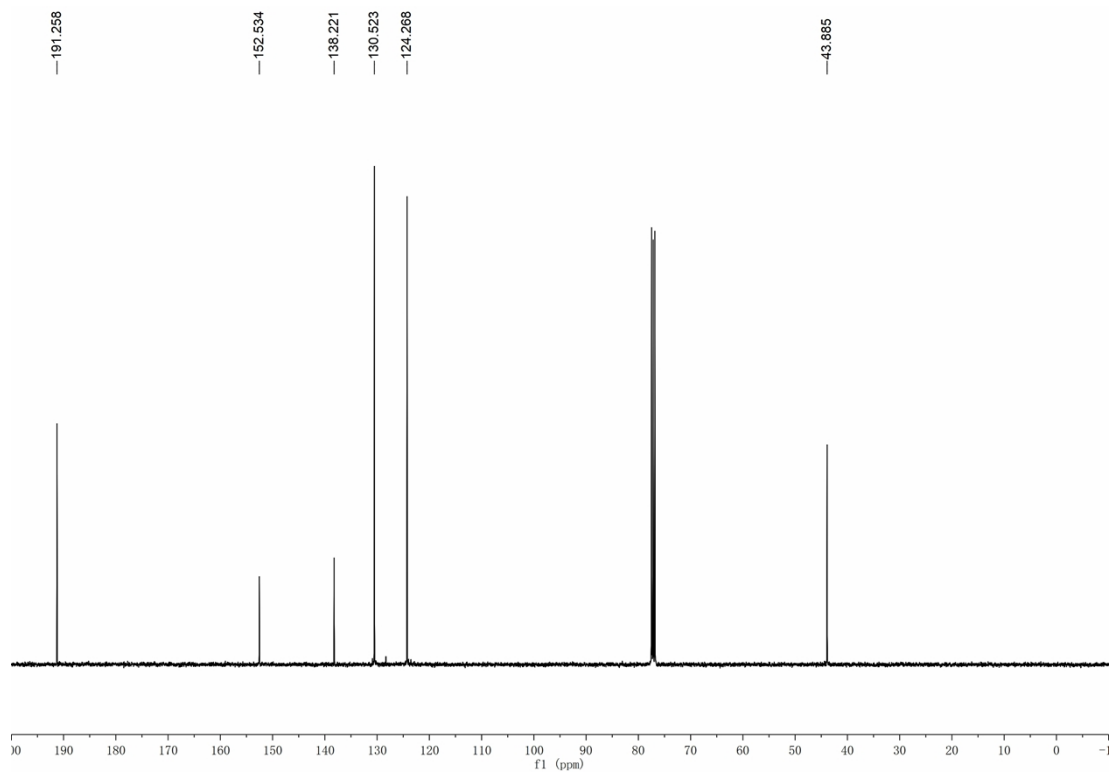

**<sup>1</sup>H NMR (400 MHz, CDCl<sub>3</sub>) of 2q**

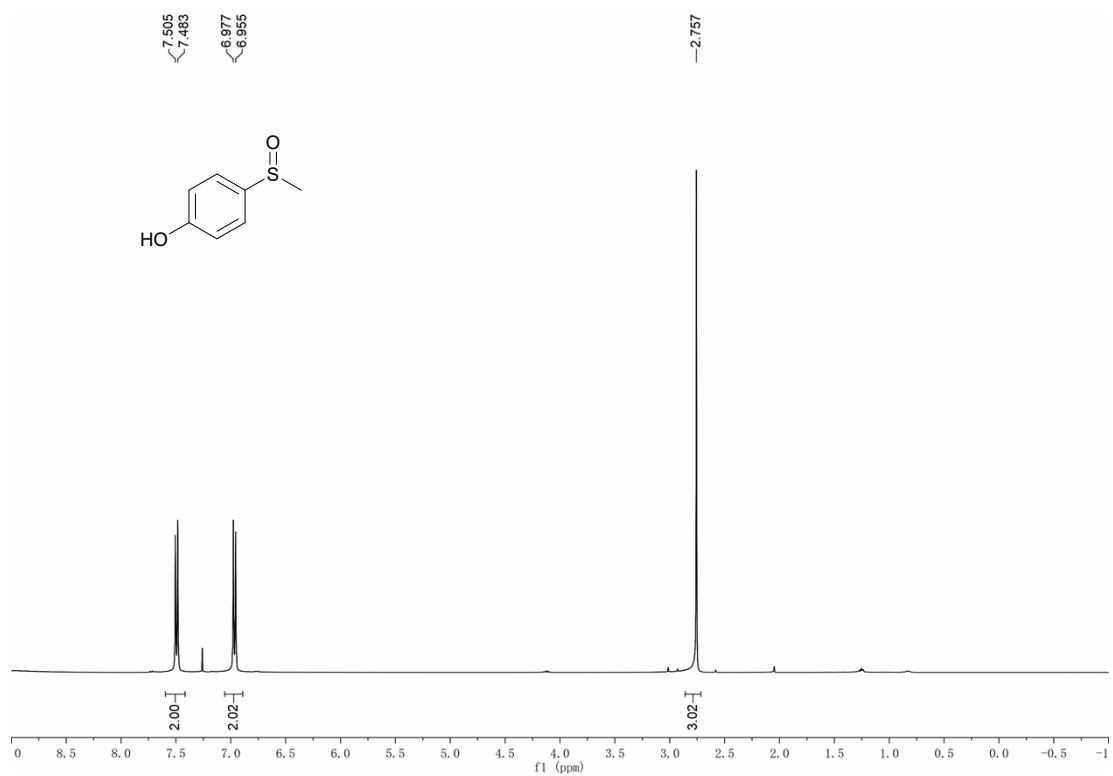

**<sup>13</sup>C NMR (400 MHz, CDCl<sub>3</sub>) of 2q**

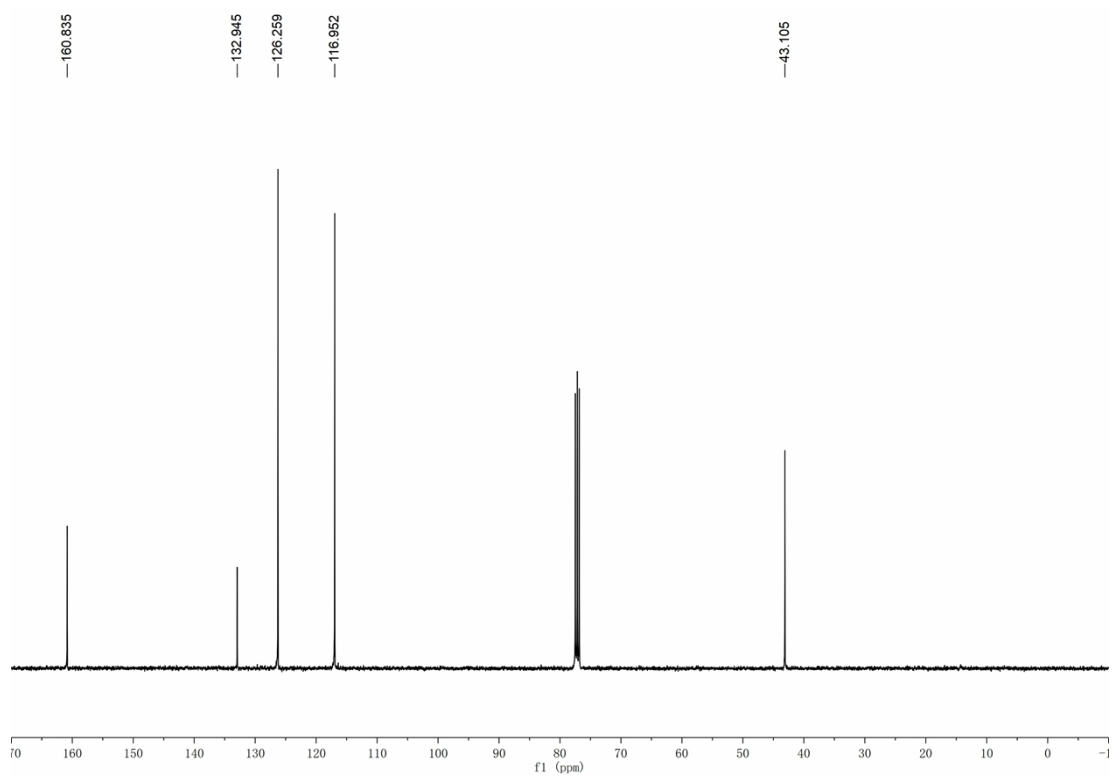

### <sup>1</sup>H NMR (500 MHz, CDCl<sub>3</sub>) of 2r

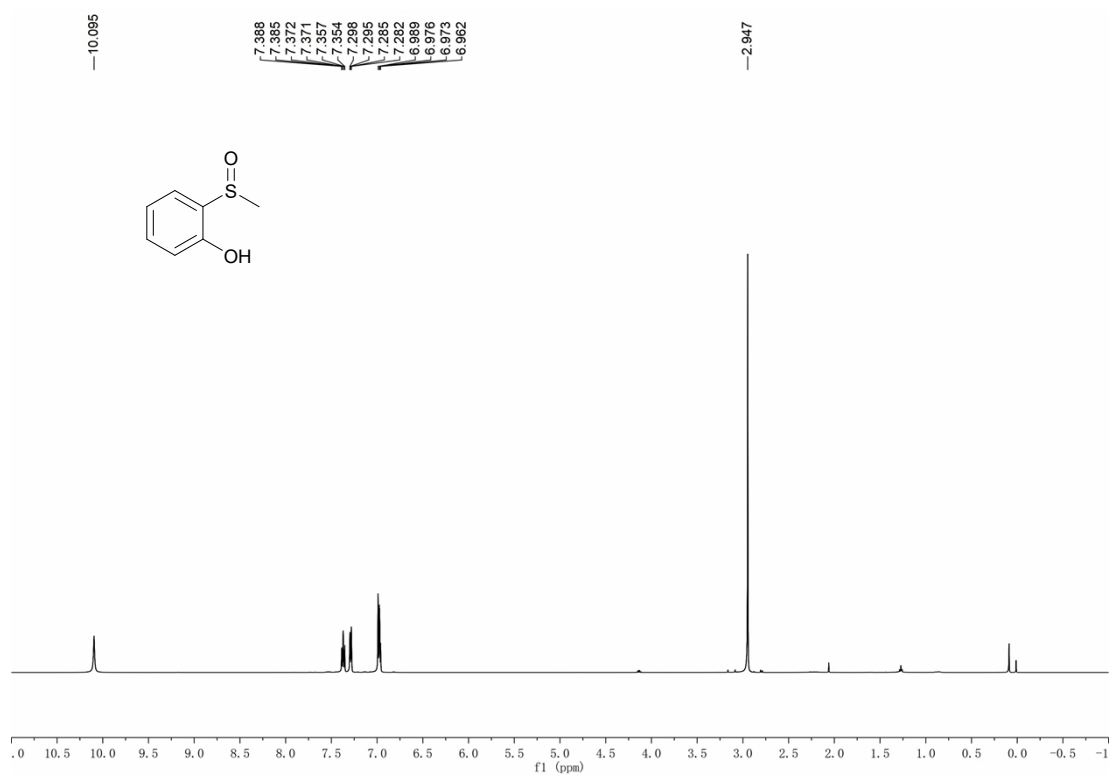

### <sup>13</sup>C NMR (500 MHz, CDCl<sub>3</sub>) of 2r

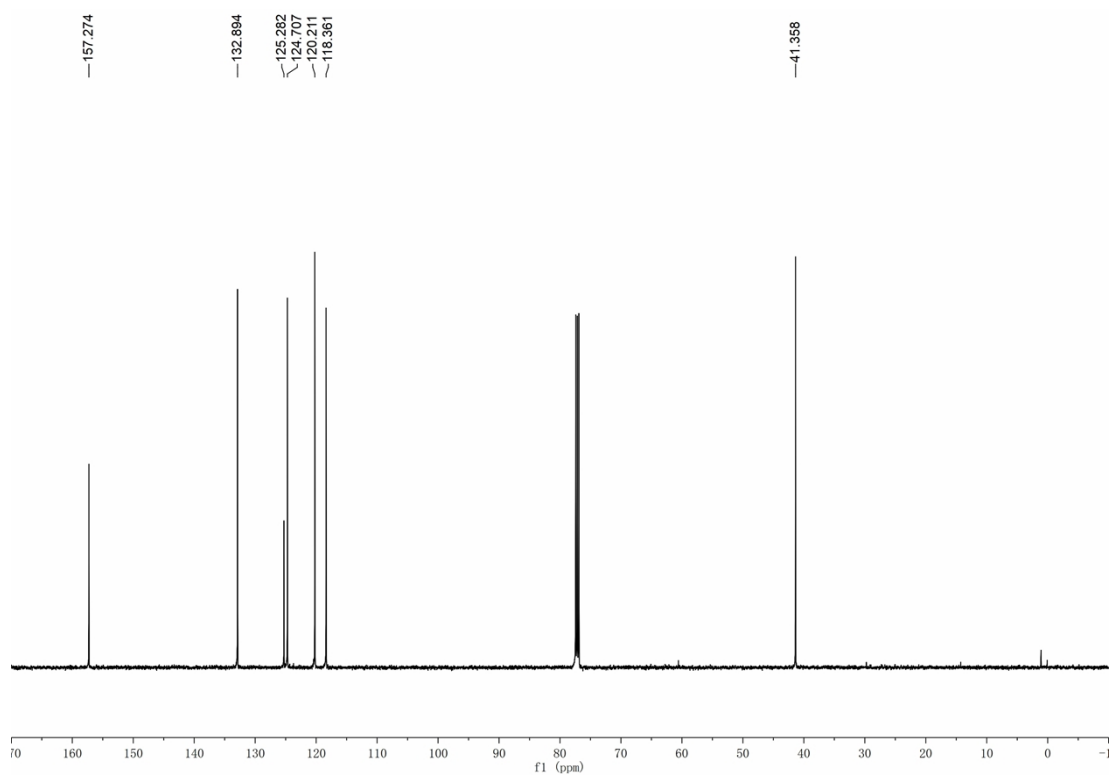

### <sup>1</sup>H NMR (400 MHz, CDCl<sub>3</sub>) of 2s

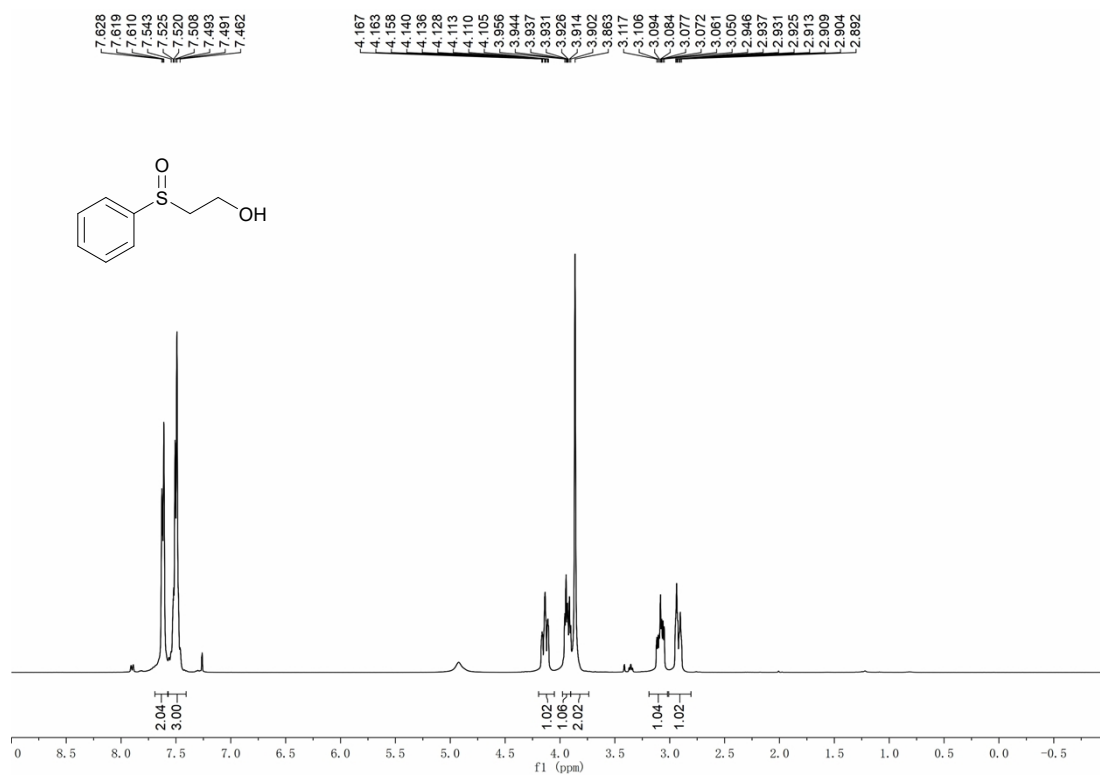

### <sup>13</sup>C NMR (400 MHz, CDCl<sub>3</sub>) of 2s

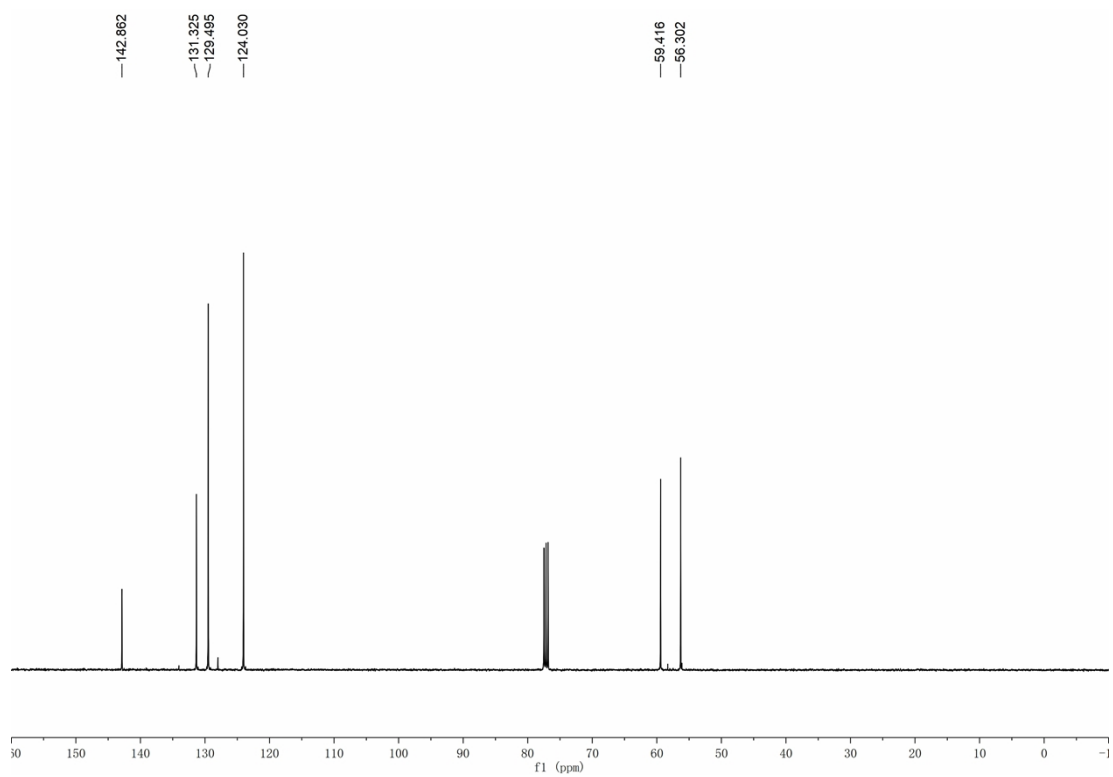

**<sup>1</sup>H NMR (400 MHz, CDCl<sub>3</sub>) of 2t**

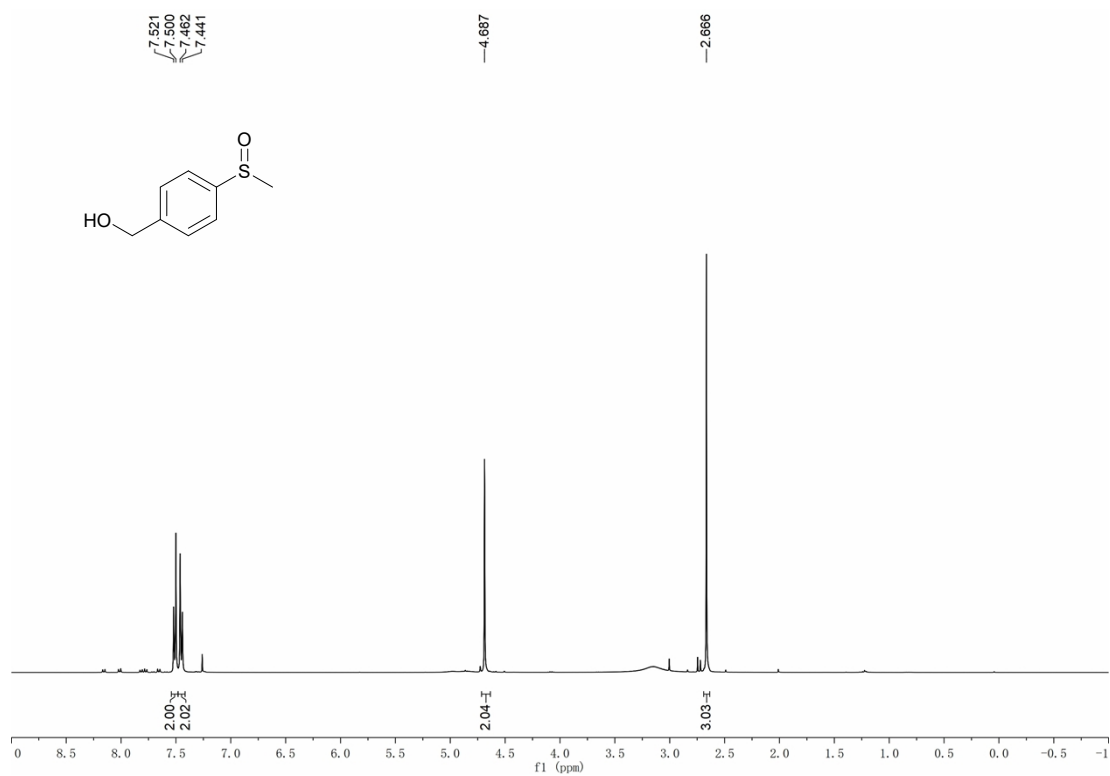

**<sup>13</sup>C NMR (400 MHz, CDCl<sub>3</sub>) of 2t**

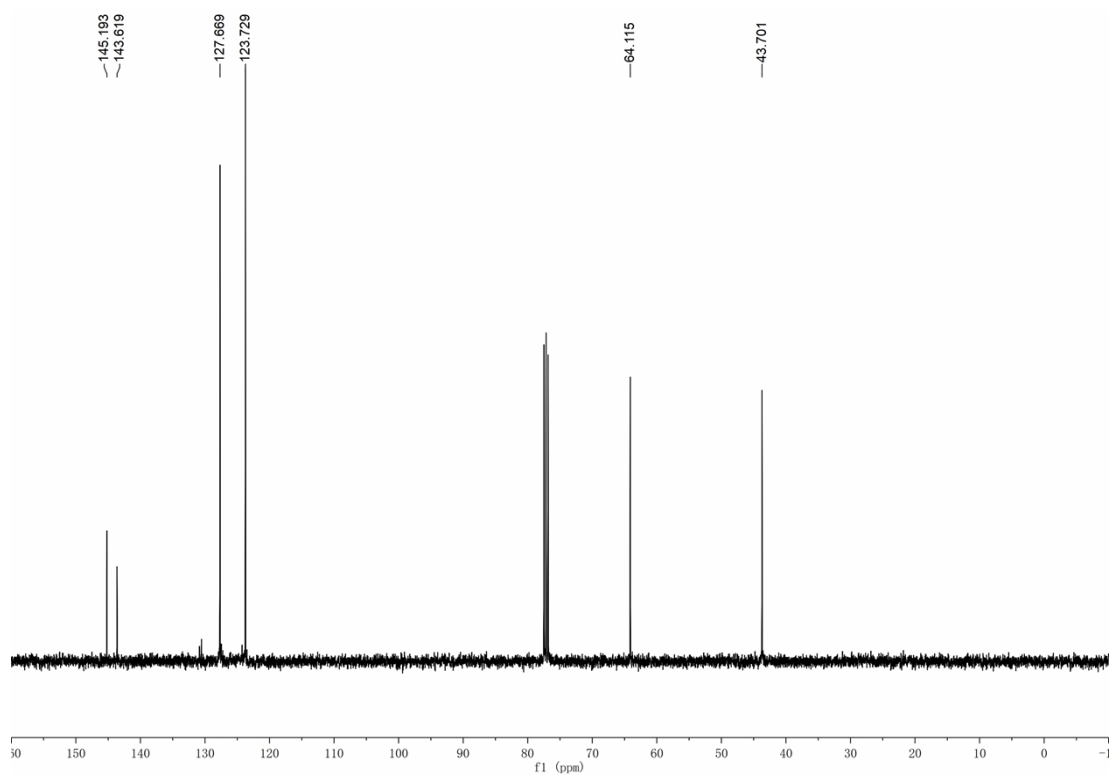

**<sup>1</sup>H NMR (500 MHz, CDCl<sub>3</sub>) of 2v**

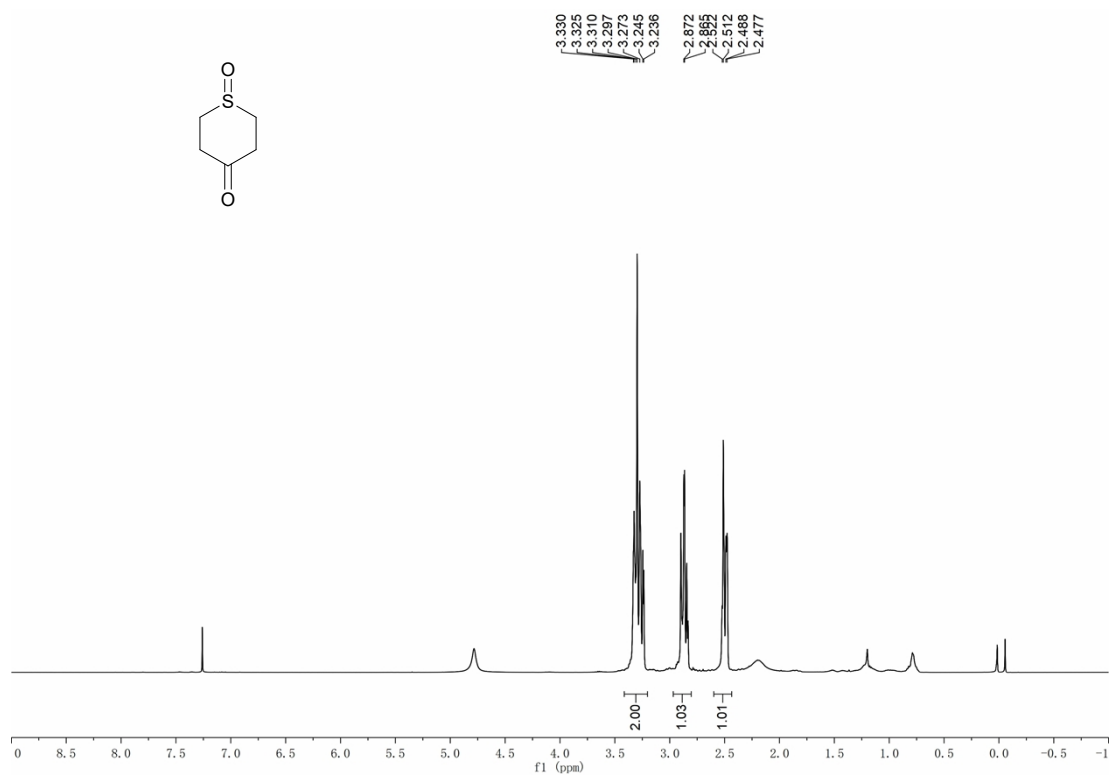

**<sup>13</sup>C NMR (500 MHz, CDCl<sub>3</sub>) of 2v**

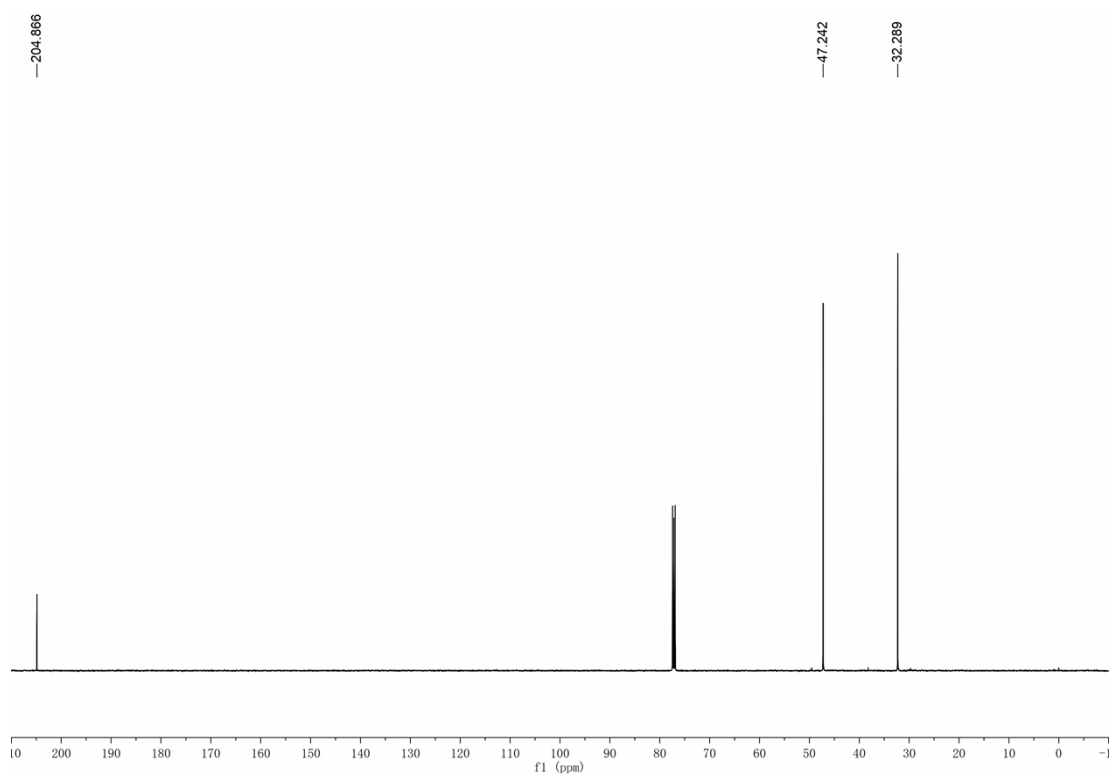

**<sup>1</sup>H NMR (400 MHz, CDCl<sub>3</sub>) of 2y**

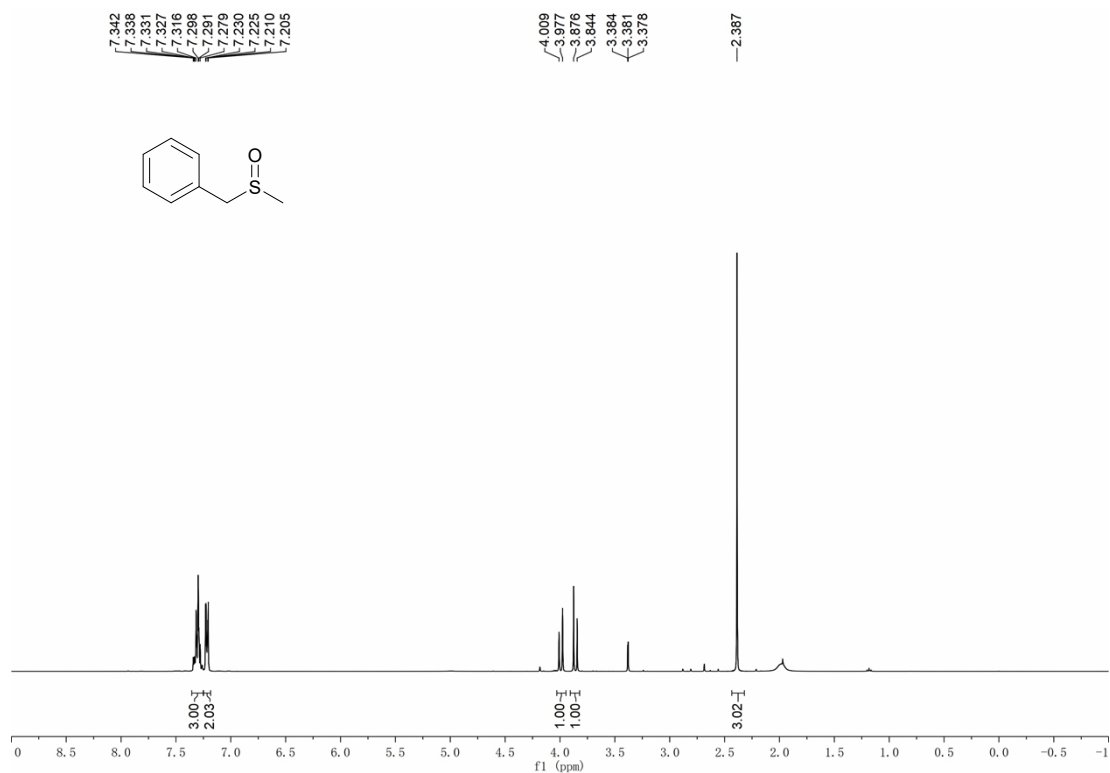

**<sup>13</sup>C NMR (400 MHz, CDCl<sub>3</sub>) of 2y**

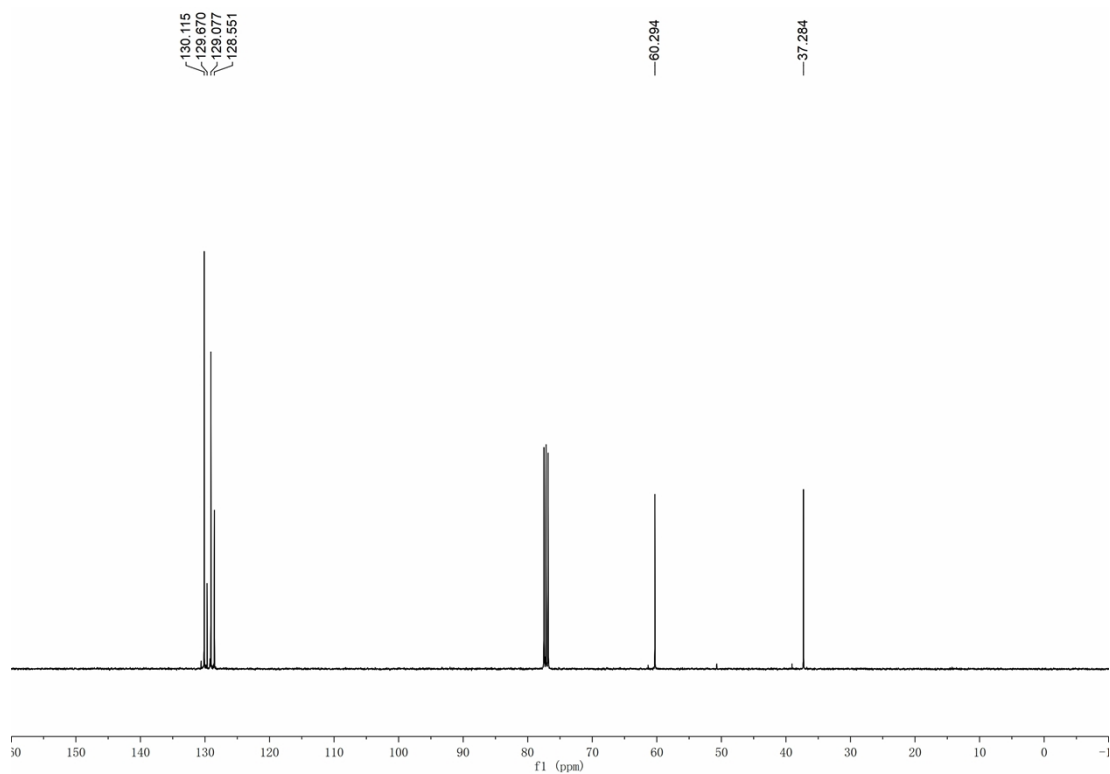

**<sup>1</sup>H NMR (500 MHz, CDCl<sub>3</sub>) of 2z**

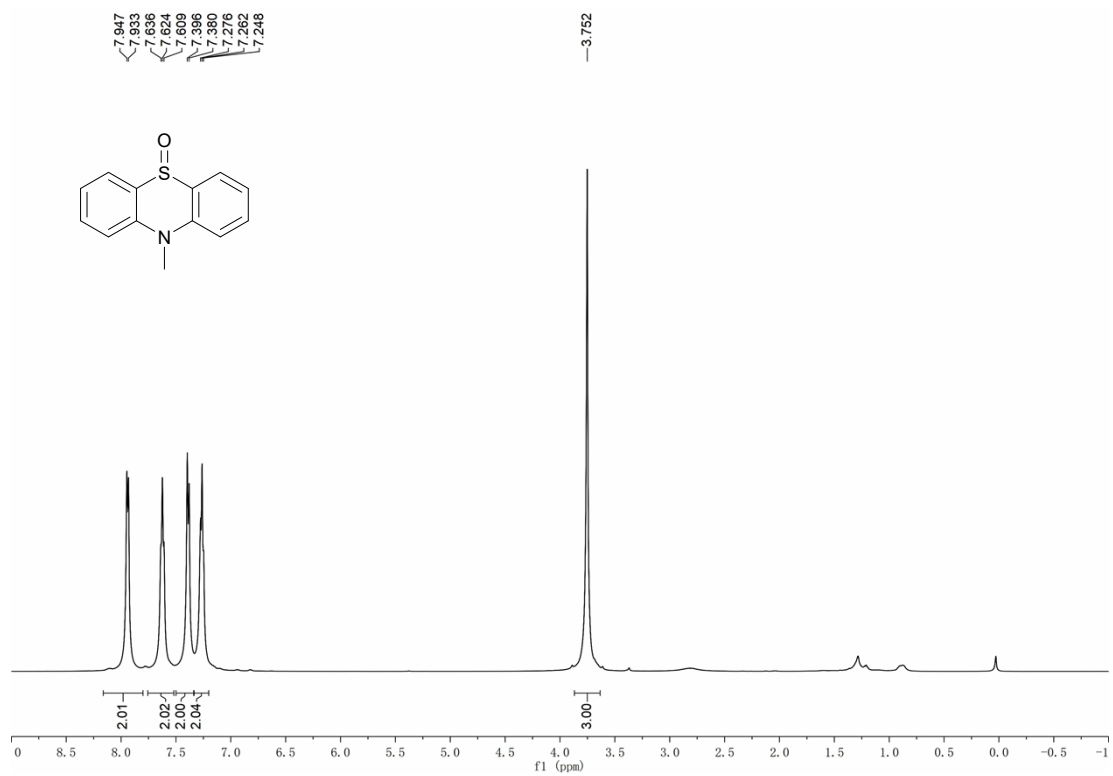

**<sup>1</sup>H NMR (500 MHz, CDCl<sub>3</sub>) of 2z**

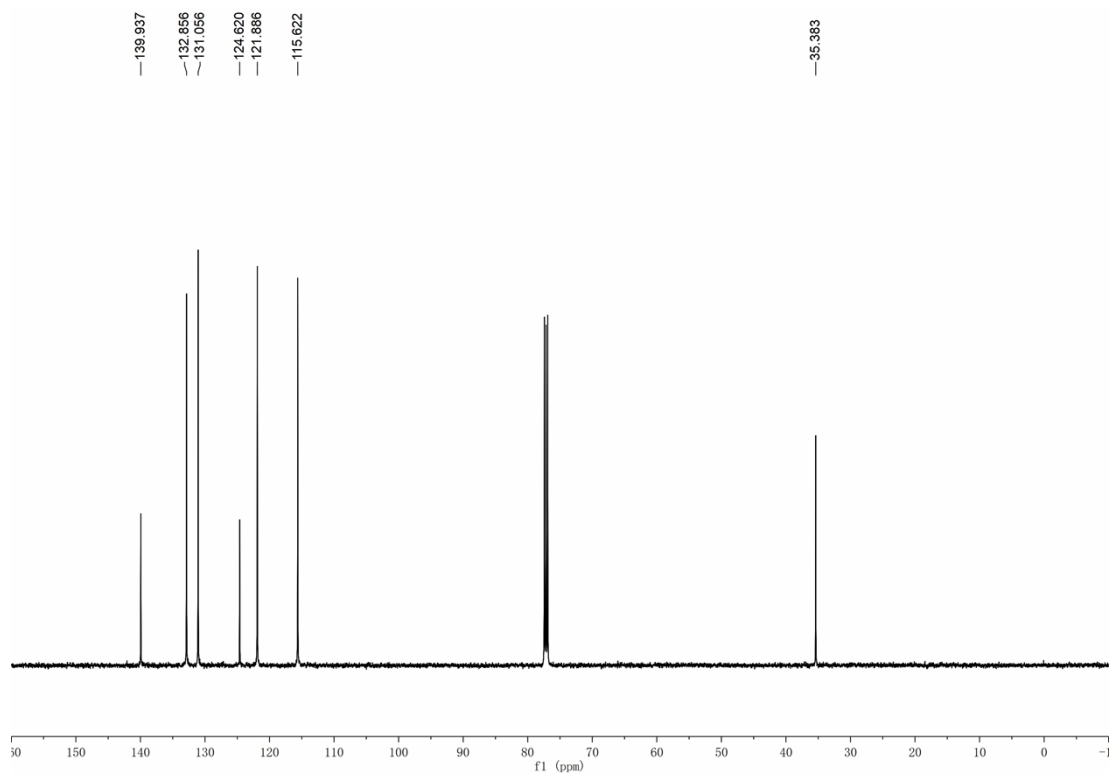

**<sup>1</sup>H NMR (400 MHz, CDCl<sub>3</sub>) of 2aa**

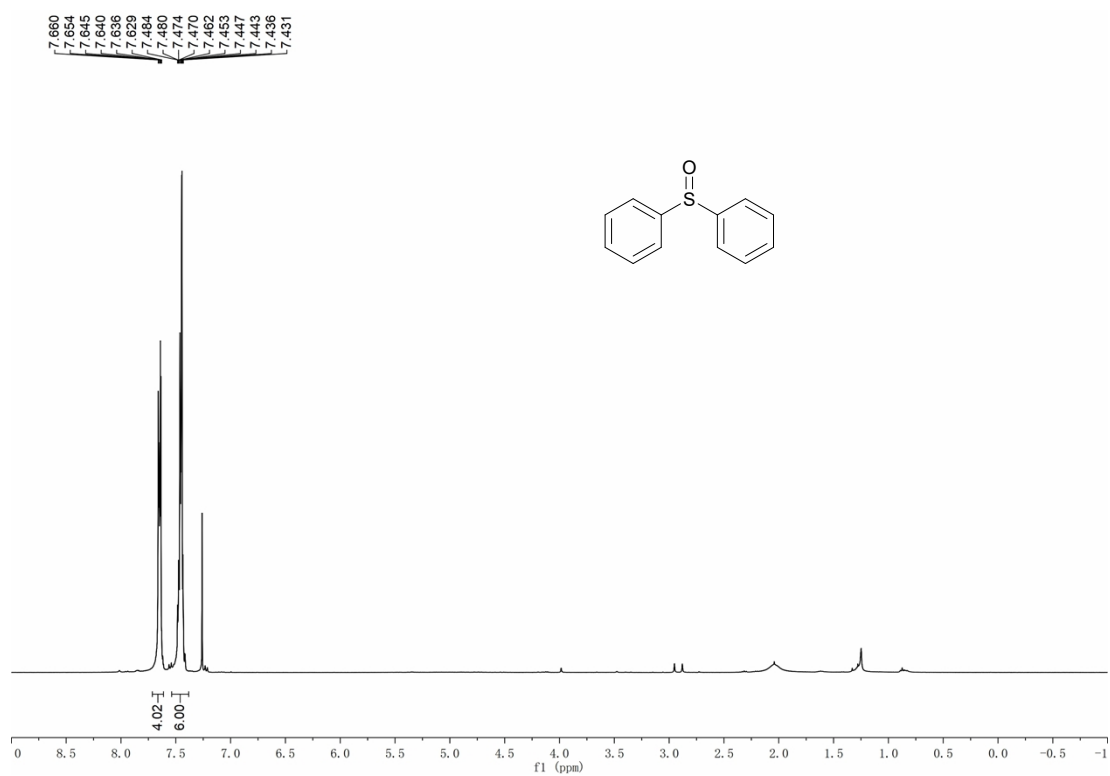

**<sup>13</sup>C NMR (400 MHz, CDCl<sub>3</sub>) of 2aa**

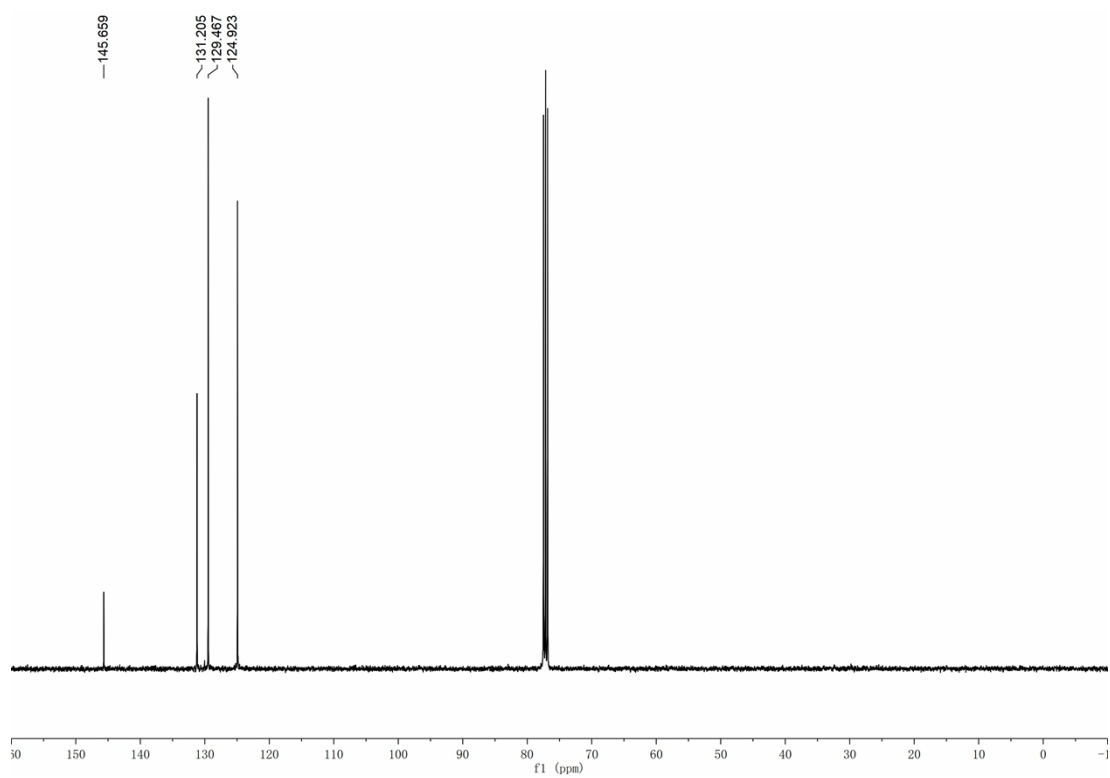

### $^1\text{H}$ NMR (400 MHz, $\text{CDCl}_3$ ) of 2ac

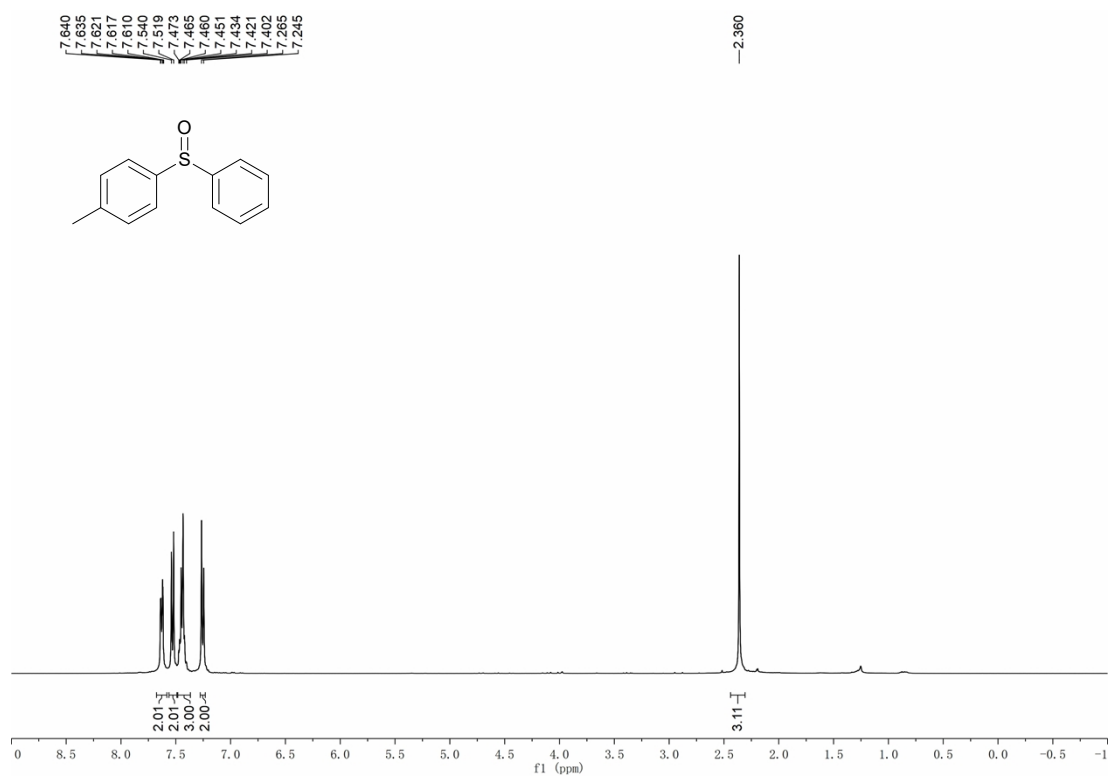

### $^{13}\text{C}$ NMR (400 MHz, $\text{CDCl}_3$ ) of 2ac

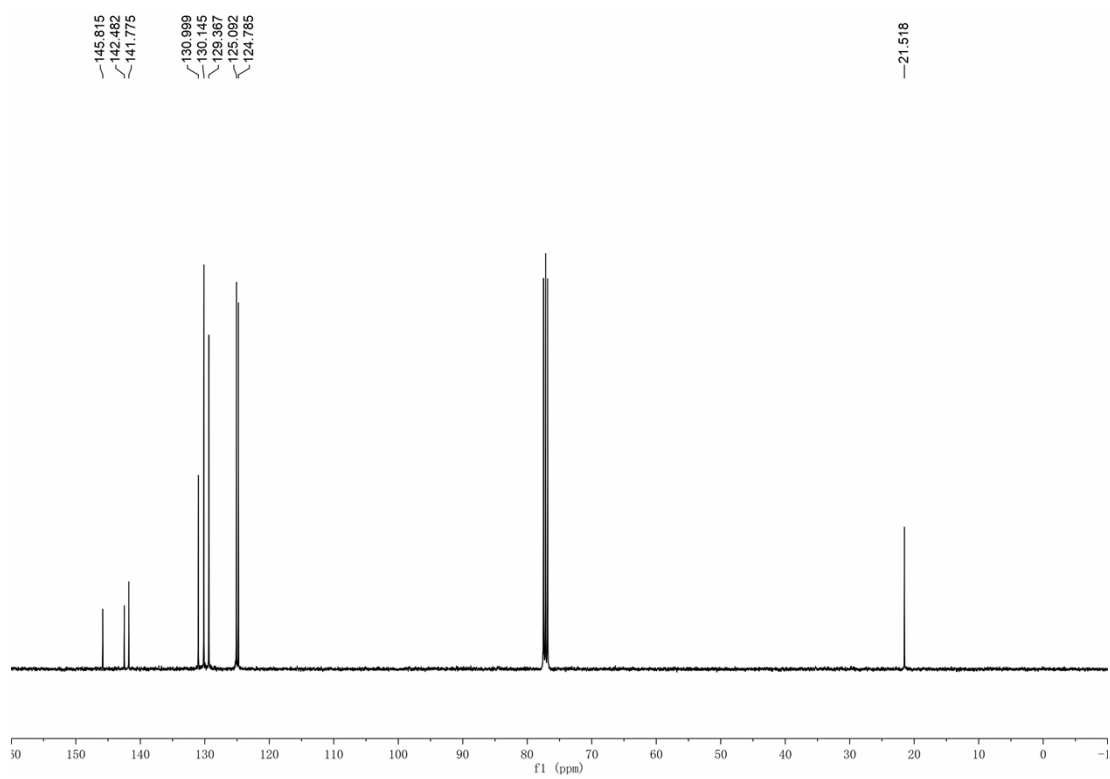

## 7. References

- 1 K. Liu, J. L. Meng, and X. F. Jiang. *Org. Process Res. Dev.* 2023, **27**, 1198–1202
- 2 K. J. Liu, Z. Wang, L. H. Lu, J. Y. Chen, F. Zeng, Y. W. Lin, Z. Cao, X. Y. Yu and W. M. He. *Green Chem.*, 2021, **23**, 496
- 3 J. L. Zhang, N. H. Y. Zhao, Y. W. Wang, S. K. Liu, T. Zhang. L. Z. Fang. *Chemistry–An Asian Journal*.2026; **21**:e70528.
- 4 Z. Cheng, P. C. Sun, A. L. Tang, W. W. Jin, and C. J. Liu. *Org. Lett.* 2019, **21**, 8925–8929.
- 5 V. Nosek and J. Míšek. *Angew. Chem. Int. Ed.* 2018, **57**,9849–9852
- 6 J. W. Yang, Y. M. Wen, L. T. Peng, Y. Chen, X. L. Cheng and Y. Z. Chen. *Org. Biomol. Chem.*, 2019,**17**, 3381-3388
- 7 E. Skolia, P. L. Gkizis, N. F. Nikitas and C. G. Kokotos. *Green Chem.*, 2022, **24**, 4108–4118
- 8 A. Rezaeifard, M. Jafarpour, A. Naeimi, R. Haddad. *Green Chem.* 2012, **14**, 3386.
- 9 D. Diprima, H. Gemoets, S. Bonciolini and K. V. Aken. *Beilstein J. Org. Chem.* 2023, **19**, 1146–1154.
- 10 S. Kumar, K. Agarwal, Sanyam, A. Mondal, and I. Gupta. *Chem Asian J.* 2024, **19**, e202400680
- 11 D. N. Harpp, S. M. Vines, J. P. Montillier, and T. H. Chan. *J. Org. Chem.*, 1976, **41**, 3987–3992
